# Supplementary material
Source: PubMed Central journal article supplement (PMC4649947)

## Supporting Information

### Preparation of a 1,2-isoxazolidine synthon for the synthesis of zetekitoxin AB.

Srinivas R. Paladugu and Ryan E. Looper\*

*Department of Chemistry, University of Utah*

*315 South 1400 East, Salt lake City, Utah, 84112*

#### General experimental considerations:

All reactions requiring anhydrous conditions were conducted in flame-dried glassware under a positive pressure of either nitrogen or argon. Commercially available reagents were used as received; otherwise, materials were purified according to *Purification of Laboratory Chemicals*.<sup>1</sup> Dichloromethane (CH<sub>2</sub>Cl<sub>2</sub>), tetrahydrofuran (THF), diethyl ether (Et<sub>2</sub>O) were degassed with nitrogen and passed through a solvent purification system (Innovative Technologies Pure Solv). Triethylamine (Et<sub>3</sub>N) was distilled from CaH<sub>2</sub> immediately prior to use. Reactions were monitored by TLC and visualized by a dual short wave/long wave UV lamp and stained with aqueous solution of ceric ammonium molybdate. Flash chromatography was performed on Merck silica gel Kieselgel 60 (230-400 mesh) from EM Science with the indicated HPLC grade solvent.

Infrared spectra were obtained using Nicolet 380-FT IR spectrometer fitted with a Smart Orbit sample system. Optical rotations were obtained at ambient temperature on a Perkin Elmer Model 343 polarimeter (Na D line) using a microcell with a 1 decimeter path length. Mass spectra were determined on a Micromass Quattro II (ESI/APCI-TOF) for HRMS at the University of Utah Mass Spectrometry Facility. <sup>1</sup>H NMR and <sup>13</sup>C NMR spectra were recorded at 500 MHz, 400 MHz and 125 MHz, 100MHz respectively. Proton resonances were reported relative to the deuterated solvent peak: 7.26 ppm for CDCl<sub>3</sub> using the following format: chemical shift (δ) (multiplicity (s= singlet, brs= broad singlet, d= doublet, dd= double of doublet, ddd= doublet of doublet of doublet, t= triplet, m= multiplet), coupling constant(s)

$J$  in Hz, integration).<sup>2</sup> Carbon resonances were reported as chemical shifts ( $\delta$ ) in parts per million, relative to the center line signal of the respective solvent peak: 77.23 ppm for  $\text{CDCl}_3$ .

References:

1. *Purification of Laboratory Chemicals*. 2003, 5<sup>th</sup> Ed. Armarego, W. L. F.; Chai, C. L. L.
2. Hoye, T. R.; Hansen, P. R.; Vyvyan, J. R. *J. Org. Chem.* **1994**, *59*, 4096.

## Experimental Procedures:

### Methyl $\alpha$ -D-2,3,4-triacetoxy-6-deoxy-6-iodoglucopyranoside (**4**)

To a solution of methyl  $\alpha$ -D-glucopyranoside **3** (15.00 g, 77.24 mmol) in toluene (1500 mL) was added triphenylphosphine (30.39 g, 115.9 mmol), imidazole (15.77 g, 231.7 mmol) and iodine (27.44 g, 108.1 mmol) at room temperature.

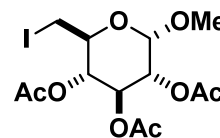

After 5 min the reaction mixture was heated to 70 °C for 2 hrs. The reaction mixture was then cooled to room temperature and water (200 mL) was added and vigorously stirred for 15 min. The aqueous layer was separated and the organic layer was extracted with water ( $2 \times 100$  mL). The combined aqueous layers were concentrated under reduced pressure and allowed it to dry under high vacuum afford methyl  $\alpha$ -D-6-deoxy-6-iodoglucopyranoside (28.00 g) as an off-white solid.

To a solution of methyl  $\alpha$ -D-6-deoxy-6-iodoglucopyranoside (28.0 g, 92.1 mmol) in pyridine (150 mL), was added acetic anhydride (52.08 mL, 552.5 mmol) and DMAP (1.12 g, 9.20 mmol) at room temperature and allowed it to stir for 16 hrs. The solvent was evaporated under reduced pressure and the residue was dissolved in toluene (300 mL) and washed with water (200 mL). The organic layer was dried over  $\text{Na}_2\text{SO}_4$  and concentrated under reduced pressure. Purification by flash column chromatography (30 % EtOAc in hexanes) gave methyl  $\alpha$ -D-2,3,4-triacetoxy-6-deoxy-6-iodoglucopyranoside **4** (23.26 g, 70% over 2 steps) as a colorless solid.  $R_f = 0.48$  (7.0:3.0 Hexanes: EtOAc); mp. 146-148°C.  $[\alpha]_D^{20} = +127^\circ$  ( $c = 0.2$ ,  $\text{CHCl}_3$ );  $^1\text{H}$  NMR ( $\text{CDCl}_3$ , 500 MHz)  $\delta$  5.45 (t,  $J = 10.0$  Hz, 1H), 4.95 (d,  $J = 4.0$  Hz, 1H), 4.88-4.83 (m, 2H), 3.80 (ddd,  $J = 18.5, 8.5, 3.0$  Hz, 1H), 3.46 (s, 3H), 3.30 (dd,  $J = 10.5, 2.5$  Hz, 1H), 3.14 (dd,  $J = 11.5, 8.5$ , Hz, 1H), 2.06 (s, 3H), 2.04 (s, 3H) 1.99 (s, 3H) ppm;  $^{13}\text{C}$  NMR ( $\text{CDCl}_3$ , 125 MHz)  $\delta$  170.3,

170.2, 169.8, 96.9, 72.7, 71.1, 69.9, 68.8, 55.9, 20.9, 20.8, 3.8 ppm; IR (Thin film) 1739, 1612, 1513, 1366, 1225, 1176, 1039 cm<sup>-1</sup>; HRMS (ESI) calcd for C<sub>13</sub>H<sub>19</sub>IO<sub>8</sub>Na (M+Na): 453.0023, found: 453.0023.

**(2*R*,3*S*,4*R*)-1-oxohex-5-ene-2,3,4-triyl triacetate (5)**

To a solution of methyl  $\alpha$ -D-2,3,4-triacetoxy-6-deoxy-6-iodoglucopyranoside **4** (10.0 g, 23.2 mmol) in hot ethanol (250 mL) was added zinc dust (15.1 g, 232.5 mmol)

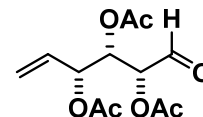

and the mixture was heated at reflux for 1 hr. The contents of the flask were cooled down to room temperature and filtered through a pad of celite® and the pad was washed with an additional amount of ethanol (50 mL). The combined filtrates were concentrated and dried under reduced pressure to give the aldehyde **5** as a yellow oil (6.32 g, quantitative) which was used for the next step without further purification and characterization.

**(3*aS*,4*S*,5*R*,6*R*,6*aS*)-1-(4-methoxybenzyl)hexahydro-1*H*-cyclopenta[*c*]isoxazole-4,5,6-triyl triacetate (6)**

The crude aldehyde **5** (6.32 g, 23.2 mmol) obtained above was dissolved in ethanol (150 mL) and pyridine (30 mL). *p*-Methoxybenzylhydroxylamine (3.44 g, 27.9 mmol) was then added to the flask and the mixture heated at 65 °C for 3 hrs. The

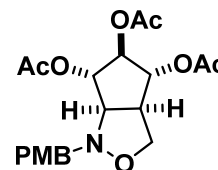

contents of the flask were cooled down to room temperature and the solvent was evaporated under reduced pressure. Purification by flash column chromatography (25% EtOAc in hexanes) gave tri-O-acetyl bicyclic isoxazolidine **6** (4.91 g, 52% over 2 steps) as a colorless solid. *R*<sub>f</sub> = 0.5 (5.0:5.0 Hexanes: EtOAc); mp. 94-96°C. [ $\alpha$ ]<sub>D</sub><sup>20</sup> = -57° (c = 0.2, CHCl<sub>3</sub>); <sup>1</sup>H NMR (CDCl<sub>3</sub>, 500 MHz)  $\delta$  7.24 (d, *J* = 8.0 Hz, 2H), 6.85 (d, *J* = 8.5 Hz, 2H), 5.32 (t, *J* = 8.5 Hz, 1H), 5.18 (brs, 1H), 4.94 (t, *J* = 6.5 Hz, 1H), 4.13-4.08 (m, 2H), 3.94 (d, *J* = 13.0 Hz, 1H), 3.78 (s, 3H), 3.71 (d, *J* = 12.5 Hz, 1H), 3.56 (brs, 1H), 3.00-2.98 (m, 1H), 2.06 (s, 3H), 2.02 (s, 3H), 1.92 (s, 3H) ppm; <sup>13</sup>C NMR (CDCl<sub>3</sub>, 125 MHz)  $\delta$  170.8, 170.7, 170.1, 159.3, 130.3, 128.6, 113.9, 78.8, 77.8, 70.8, 69.3, 58.9, 55.4, 49.5, 21.0, 21.0, 20.9, 1.2 ppm; IR (Thin film) 1752, 1369, 1244, 1221, 1044, 555 cm<sup>-1</sup>; HRMS (ESI) calcd for C<sub>20</sub>H<sub>25</sub>NO<sub>8</sub>Na (M+Na): 430.1478, found: 430.1479.

**(3a*S*,4*S*,5*R*,6*R*,6a*S*)-1-(4-methoxybenzyl)hexahydro-1*H*-cyclopenta[*c*]isoxazole-4,5,6-triol (7)**

To a solution of tri-*O*-acetyl bicyclic isoxazolidine **6** (1.6 g, 3.93 mmol) in methanol (20 mL) was added sodium methoxide (0.63 g, 11.79 mmol) at 0 °C and the reaction mixture stirred at room temperature for 1 hr. Saturated ammonium

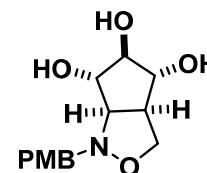

chloride solution was added to adjust the pH ~ 7. The solvent was then evaporated under reduced pressure. Residue was dissolved in minimum amount of water and extracted several times with 20% *i*PrOH-CHCl<sub>3</sub> mixture. The combined organic layers were dried over Na<sub>2</sub>SO<sub>4</sub> and concentrated under reduced pressure. Purification by flash column chromatography (5% MeOH in CHCl<sub>3</sub>) gave triol **7** (0.88 g, 80%) as a colorless solid. *R*<sub>f</sub> = 0.4 (9.0:1.0 CHCl<sub>3</sub>: MeOH); mp. 118-120°C. [α]<sub>D</sub><sup>20</sup> = +52.5° (c = 0.4, MeOH); <sup>1</sup>H NMR (DMSO *d*<sub>6</sub>, 500 MHz) δ 7.24 (d, *J* = 9.0 Hz, 2H), 6.86 (d, *J* = 9.0 Hz, 2H), 5.00 (d, *J* = 4.5 Hz, 1H), 4.97 (d, *J* = 5.5 Hz, 1H), 4.92 (d, *J* = 4.5 Hz, 1H), 3.96 (brs, 1H), 3.75 (s, 4H), 3.61 (d, *J* = 13.0 Hz, 1H), 3.54 (dd, *J* = 8.5, 1.5 Hz, 1H), 3.33 (brs, 3H), 3.16-3.15 (m, 1H), 2.69-2.68 (m, 1H) ppm; <sup>13</sup>C NMR (CDCl<sub>3</sub>, 125 MHz) δ 159.2, 130.1, 128.6, 113.9, 80.3, 78.6, 71.9, 69.4, 59.0, 55.4, 49.7, 1.2 ppm; IR (Thin film) 3343, 2901, 2835, 1611, 1513, 1463, 1352, 1302, 1249, 1177, 1107, 1033, 824, 805, 762, 599, 580, 572, 561 cm<sup>-1</sup>; HRMS (ESI) calcd for C<sub>14</sub>H<sub>19</sub>NO<sub>5</sub>Na (M+Na): 304.1161, found: 304.1157.

**((3*S*,4*R*)-2-(4-methoxybenzyl)isoxazolidine-3,4-diyl)dimethanol (9)**

To a solution of the triol **7** (6.90 g, 24.5 mmol) in water (250 mL) was added NaIO<sub>4</sub> (18.4 g, 85.9 mmol, dissolved in 150 mL of water) and solid NaHCO<sub>3</sub> (to

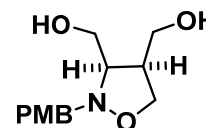

maintain the pH of the reaction ~ 8) at 0 °C. The mixture was allowed to stir at room temperature for 30 min. The mixture was filtered through a pad of celite® and the pad was washed with an additional EtOAc (50 mL). The organic layer was separated and the aqueous layer was extracted with EtOAc (3 × 50 mL). The combined organic layers were dried over Na<sub>2</sub>SO<sub>4</sub> and concentrated under reduced pressure to give **8**.

The crude compound **8** obtained above was dissolved in dry THF (250 mL) and cooled to 0 °C. LiAlH<sub>4</sub> (1.96 g, 51.7 mmol) was then added in portions and the reaction mixture stirred at room

temperature for 16 hrs. The mixture was again cooled to 0 °C and ethyl acetate (70 mL) was added carefully followed by water (30 mL) and then sodium sulfate. The mixture was then stirred until a clear solution persists and the mixture filtered through a pad of celite® and the pad was washed with an additional portion of ethyl acetate (50 mL). Solvent was evaporated under reduced pressure and purification by flash column chromatography (3% MeOH in CHCl<sub>3</sub>) gave diol **9** (4.34 g, 70% over 2 steps) as a colorless solid.  $R_f = 0.45$  (9.0:1.0 CHCl<sub>3</sub>: MeOH); mp. 92-94°C.  $[\alpha]_D^{20} = +73^\circ$  (c = 0.2, CHCl<sub>3</sub>); <sup>1</sup>H NMR (CDCl<sub>3</sub>, 500 MHz)  $\delta$  7.27 (d,  $J = 8.0$  Hz, 2H), 6.87 (d,  $J = 9.0$  Hz, 2H), 4.20 (t,  $J = 8.5$  Hz, 1H), 4.00 (d,  $J = 9.0$  Hz, 1H), 3.84-3.81 (m, 2H), 3.79 (s, 3H), 3.75 (dd,  $J = 10.5, 5.0$  Hz, 1H), 3.68 (t,  $J = 7.0$  Hz, 1H), 3.65-3.57 (m, 2H), 3.26 (ddd,  $J = 13.0, 8.0, 5.5$  Hz, 1H), 3.06 (m, 1H), 2.96 (brs, 1H), 2.88 (brs, 1H) ppm; <sup>13</sup>C NMR (CDCl<sub>3</sub>, 125 MHz)  $\delta$  159.3, 130.5, 128.1, 114.1, 68.5, 66.9, 60.7, 60.7, 60.6, 55.4, 46.4 ppm; IR (Thin film) 3391, 2933, 2880, 1611, 1512, 1463, 1301, 1247, 1176, 1110, 1031, 824, 779, 757, 577 cm<sup>-1</sup>; HRMS (ESI) calcd for C<sub>13</sub>H<sub>19</sub>NO<sub>4</sub>Na (M+Na): 276.1212, found: 276.1211.

**(3S,4S)-3,4-bis(((tert-butyldiphenylsilyl)oxy)methyl)-2-(4-methoxybenzyl)isoxazolidine (10)**

To a solution of the diol **9** (2.79 g, 11.0 mmol) in dry dichloromethane (30 mL) was added imidazole (1.50 g, 22.0 mmol) and TBDPS-Cl (6.05 g, 22.0 mmol) at 0 °C and the mixture was stirred at room temperature for

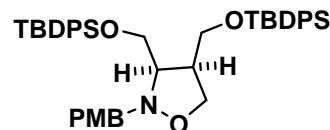

1hr. Solvent was evaporated and the resulting oil was purified by flash column chromatography (4% EtOAc in hexanes) give the di-TBDPS protected isoxazolidine derivative **10** (7.79 g, 97%) as a colorless liquid.  $R_f = 0.55$  (9.0:1.0 hexanes: EtOAc);  $[\alpha]_D^{20} = +45^\circ$  (c = 0.2, CHCl<sub>3</sub>); <sup>1</sup>H NMR (CDCl<sub>3</sub>, 500 MHz)  $\delta$  7.58 (t,  $J = 8.5$  Hz, 8H), 7.31-7.29 (m, 12H), 7.24 (d,  $J = 9.5$  Hz, 2H), 6.82 (d,  $J = 9.5$  Hz, 2H), 4.14 (t,  $J = 19.0$  Hz, 1H), 4.00 (d,  $J = 16.5$  Hz, 1H), 3.94-3.91 (m, 1H), 3.87 (d,  $J = 16.5$  Hz, 1H), 3.78 (brs, 4H), 3.73-3.69 (m, 2H), 3.63-3.59 (m, 1H), 3.14-3.12 (m, 1H), 2.94-2.93 (m, 1H), 0.96 (s, 9H), 0.93 (s, 9H) ppm; <sup>13</sup>C NMR (CDCl<sub>3</sub>, 125 MHz)  $\delta$  158.1, 135.7, 135.7, 135.7, 133.7, 133.6, 133.4, 133.3, 130.4, 130.0, 129.8, 129.8, 127.9, 127.9, 113.9, 69.4, 67.6, 63.2, 62.2, 61.9, 55.4, 47.4, 26.9, 26.9, 19.3, 19.2, 1.2 ppm;



**(3*S*,3*aS*)-3-(((tert-butylidiphenylsilyl)oxy)methyl)tetrahydro-6*H*-oxazolo[3,4-*b*]isoxazol-6-one (13).**

To a solution of the cyclic carbamate **12** (2.80 g, 17.6 mmol) in dry dichloromethane (20 mL) was added imidazole (1.20 g, 17.6 mmol) and TBDPSCI (4.61 mL, 17.6 mmol) at 0 °C and the contents were stirred at room

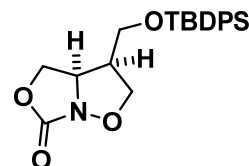

temperature for 1 hr. Solvent was evaporated and the residue was purified by flash column chromatography (15% EtOAc in hexanes) gave TBDPS protected isoxazolidine cyclic carbamate derivative **13** (5.94 g, 85%) as a colorless solid.  $R_f = 0.42$  (8.0:2.0 hexanes: EtOAc); mp. 102-104°C.  $[\alpha]_D^{20} = -81.5^\circ$  (c = 0.2, CHCl<sub>3</sub>); <sup>1</sup>H NMR (CDCl<sub>3</sub>, 500 MHz)  $\delta$  7.63-7.60 (m, 4H), 7.47-7.39 (m, 6H), 4.72 (d,  $J = 9.5$  Hz, 1H), 4.57 (dd,  $J = 10.0, 7.5$  Hz, 1H), 4.19 (t,  $J = 8.5$  Hz, 1H), 4.10 (dd,  $J = 9.0, 7.5$  Hz, 1H), 3.78-3.71 (m, 2H), 3.61 (t,  $J = 9.0$  Hz, 1H), 2.96 (sextet,  $J = 9.0$  Hz, 1H), 1.06 (s, 9H) ppm; <sup>13</sup>C NMR (CDCl<sub>3</sub>, 125 MHz)  $\delta$  162.4, 135.6, 135.6, 132.7, 132.5, 130.3, 128.1, 128.1, 72.5, 63.7, 61.2, 58.8, 46.0, 26.9, 19.3 ppm; IR (Thin film) 2929, 2857, 1786, 1427, 1391, 1379, 1216, 1187, 1132, 1111, 1040, 1012, 936, 822, 789, 741, 702, 649, 614, 590 cm<sup>-1</sup>; HRMS (ESI) calcd for C<sub>22</sub>H<sub>27</sub>NO<sub>4</sub>SiNa (M+Na): 420.1607, found: 420.1610.

**((3*S*,4*S*)-4-(((tert-butylidiphenylsilyl)oxy)methyl)isoxazolidin-3-yl)methanol**

**(14).** To a solution of the TBDPS protected isoxazolidine cyclic carbamate derivative **13** (1.10 g, 2.76 mmol) in ethanol (10 mL) was added Cs<sub>2</sub>CO<sub>3</sub> (0.99

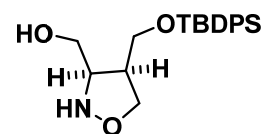

g, 3.0 mmol) at 0 °C and the mixture stirred at room temperature for 2 hrs. Solvent was evaporated under reduced pressure (with cooling of the rotary evaporator bath) and the residue purified by flash column chromatography (65% EtOAc in hexanes) to furnish the 1,2-isoxazolidine amino alcohol **16** (0.74 g, 72%) as a colorless liquid.  $R_f = 0.4$  (100% EtOAc);  $[\alpha]_D^{20} = -22^\circ$  (c = 0.1, CHCl<sub>3</sub>); <sup>1</sup>H NMR (CDCl<sub>3</sub>, 400 MHz)  $\delta$  7.65 (d,  $J = 7.2$  Hz, 4H), 7.47-7.38 (m, 6H), 3.93 (t,  $J = 16.8$  Hz, 1H), 3.80-3.71 (m, 4H), 3.67 (t,  $J = 14.4$  Hz, 1H), 3.59 (dd,  $J = 12.0, 6.4$  Hz, 1H), 2.89 (sextet,  $J = 6.8$  Hz, 1H), 1.06 (s, 9H) ppm; <sup>13</sup>C NMR (CDCl<sub>3</sub>, 100 MHz)  $\delta$  135.7, 135.7, 133.0, 132.9, 130.2, 130.2, 128.1, 128.0, 128.0, 72.6, 63.3, 61.8, 59.6,

48.1, 27.0, 19.3, 1.2 ppm; IR (Thin film) 3214, 3070, 2929, 2856, 1588, 1471, 1427, 1390, 1361, 1111, 823, 741, 701, 613 cm<sup>-1</sup>; HRMS (ESI) calcd for C<sub>21</sub>H<sub>29</sub>NO<sub>3</sub>SiNa (M+Na): 394.1815, found: 394.1813.

**tert-butyl-(2-((3*S*,4*S*)-3-(bromomethyl)-4-(((tert-butyl)diphenylsilyl)oxy)methyl)isoxazolidin-2-yl)-2-oxoethyl)carbamate (**16**).** To the solution of amino alcohol **14** (180 mg

g, 0.48 mmol) in dry dichloromethane (10 mL) was added PPh<sub>3</sub> (0.15 g,

0.58 mmol) and CBr<sub>4</sub> (0.19 g, 0.58 mmol) at 0 °C and the reaction

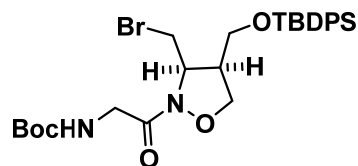

allowed to stir at room temperature for 2 hr. The mixture was cooled to 0 °C and *N*-Boc-Gly-OH (0.10 g,

0.58 mmol), EDCI (0.09 g, 0.58 mmol) and HOBT (0.09 g, 0.58 mmol) added simultaneously. The

reaction mixture was stirred at room temperature for 16 hrs. The solvent was evaporated under reduced

pressure and the residue purified by flash column chromatography (12 % EtOAc in Hexanes) give the

bromomethyl isoxazoline amide **16** (114 mg, 40%) as a colorless liquid. *R*<sub>f</sub> = 0.48 (7:3 hexanes:EtOAc);

[α]<sub>D</sub><sup>20</sup> = +43.5° (c = 0.2, CHCl<sub>3</sub>); <sup>1</sup>H NMR (CDCl<sub>3</sub>, 500 MHz) δ 7.65-7.63 (m, 4H), 7.46-7.38 (m, 6H),

5.17 (brs, 1H), 4.64 (ddd, *J* = 14.0, 8.0, 6.0 Hz, 1H), 4.17-4.12 (m, 2H), 4.01-3.92 (m, 3H), 3.84 (dd, *J* =

10.0, 8.5 Hz, 1H), 3.64 (dd, *J* = 10.0, 5.0 Hz, 1H), 3.37 (dd, *J* = 10.5, 8.0 Hz, 1H), 3.01-2.94 (m, 1H),

1.45 (s, 9H), 1.06 (s, 9H) ppm; <sup>13</sup>C NMR (CDCl<sub>3</sub>, 125 MHz) δ 171.0, 156.0, 135.7, 135.6, 135.6, 133.0,

132.9, 130.2, 130.1, 128.1, 79.9, 72.1, 60.1, 59.9, 59.5, 46.5, 46.3, 42.1, 41.0, 29.9, 28.7, 28.5, 27.1, 26.9,

19.3 ppm; IR (Thin film) 3428, 2930, 2857, 1711, 1589, 1502, 1427, 1391, 1365, 1244, 1165, 1105, 998, 941, 864, 822, 754, 700, 658, 612 cm<sup>-1</sup>; HRMS (ESI) calcd for C<sub>28</sub>H<sub>39</sub><sup>79</sup>BrN<sub>2</sub>O<sub>5</sub>SiNa (M+Na): 613.1710, found: 613.1711.



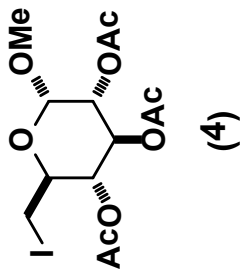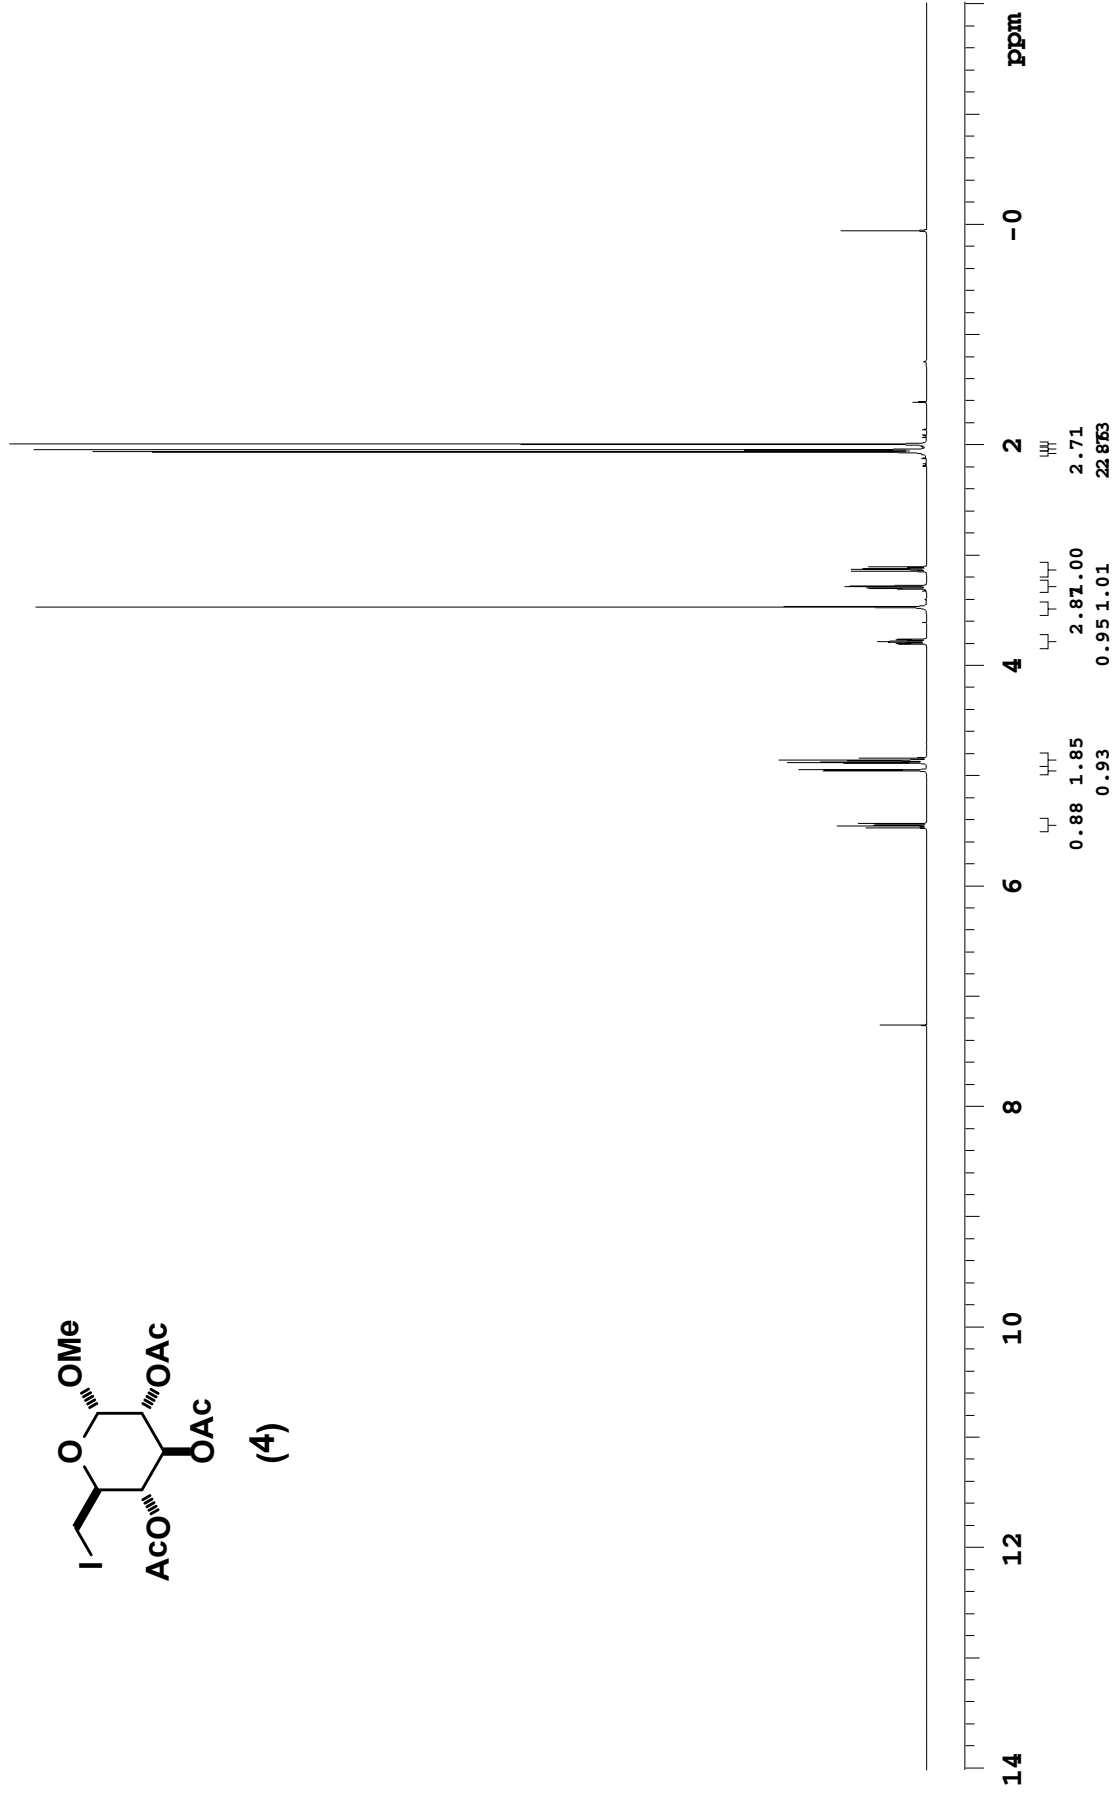

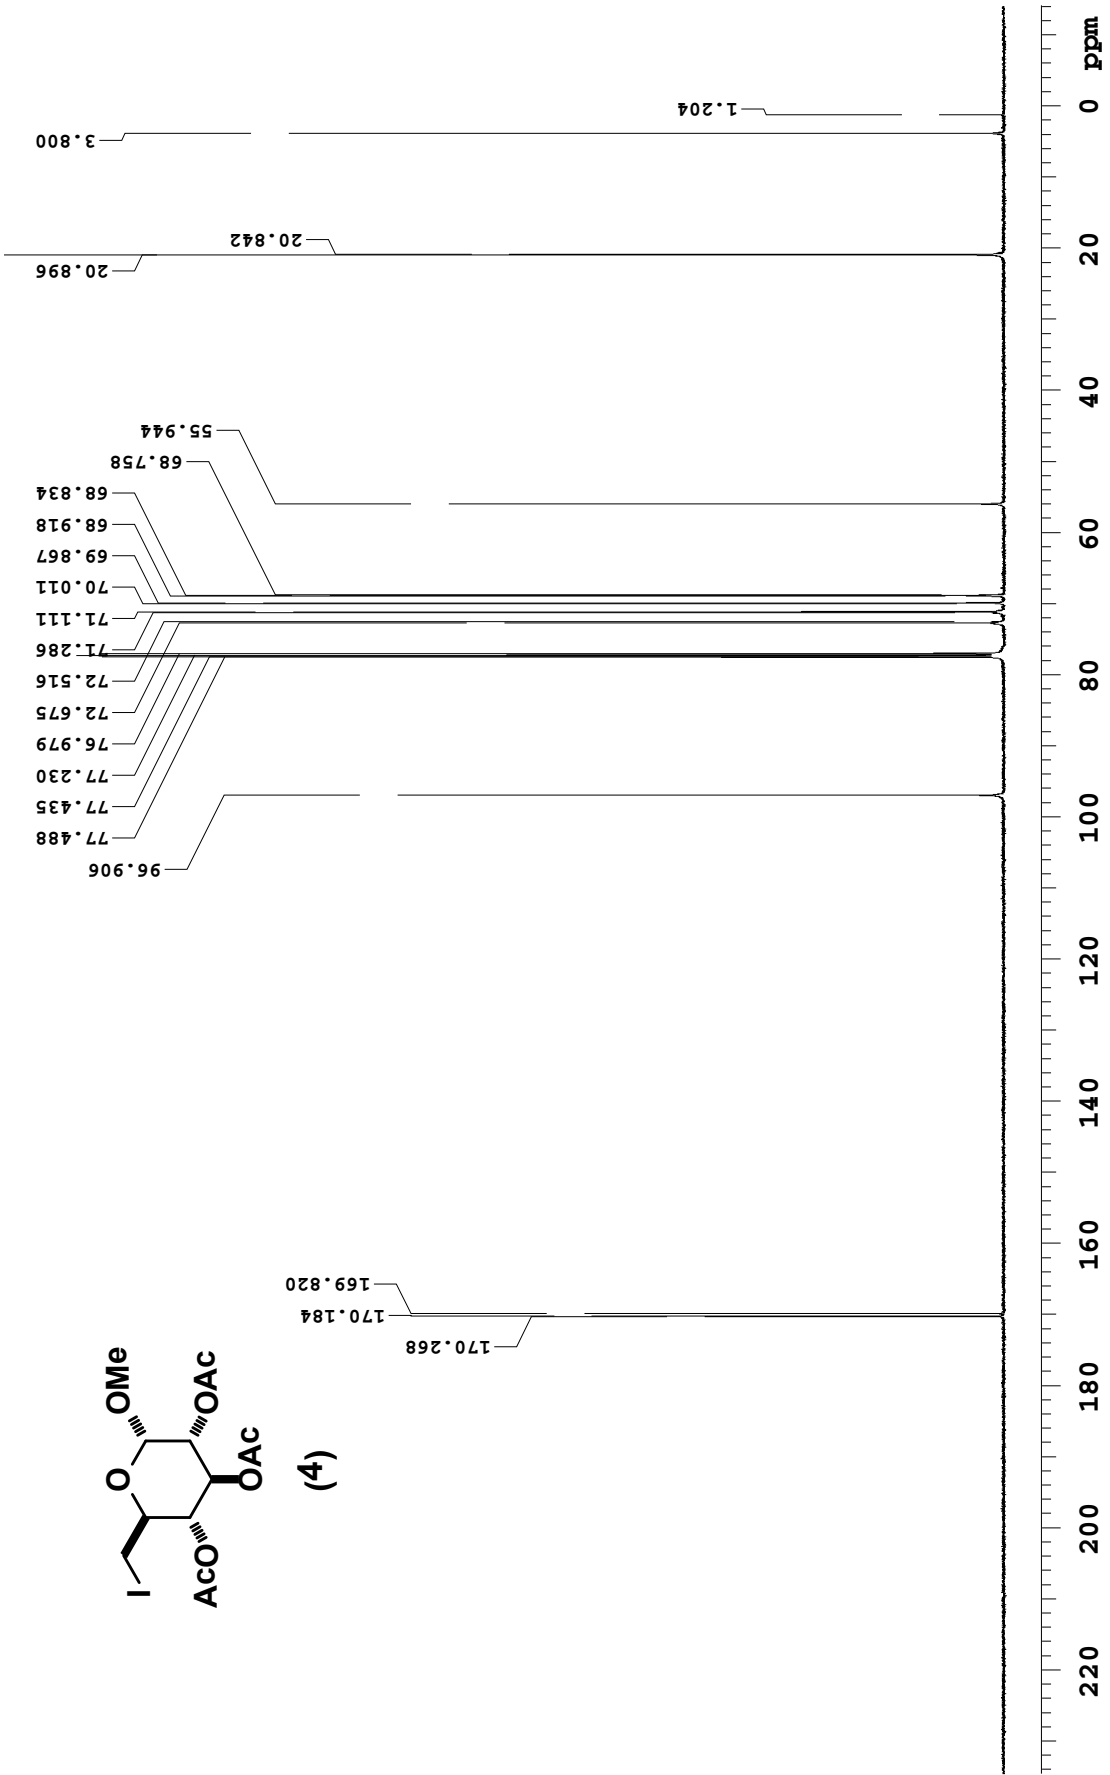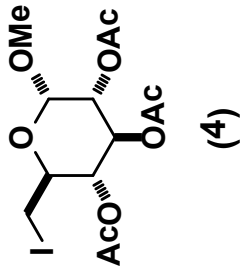



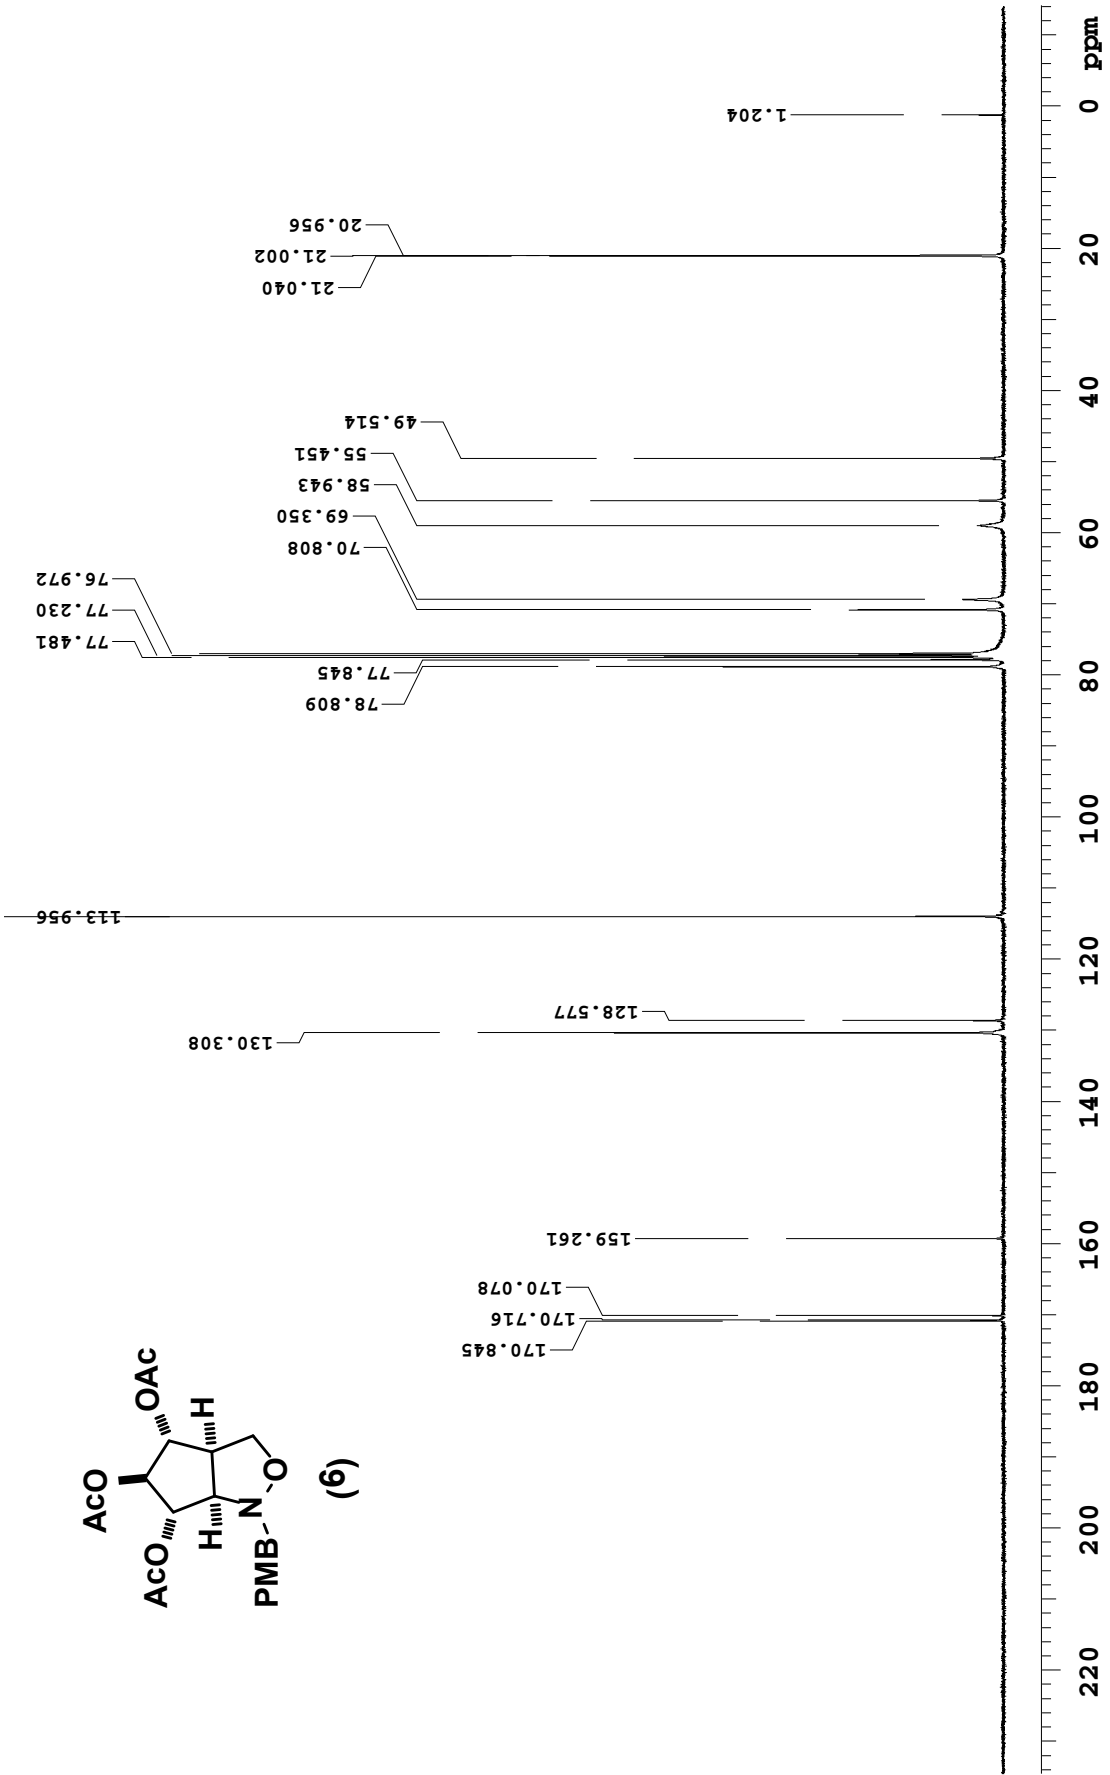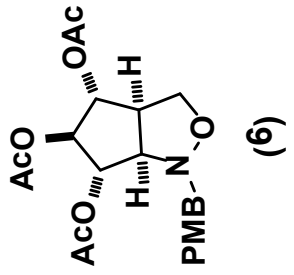

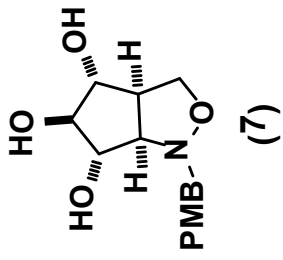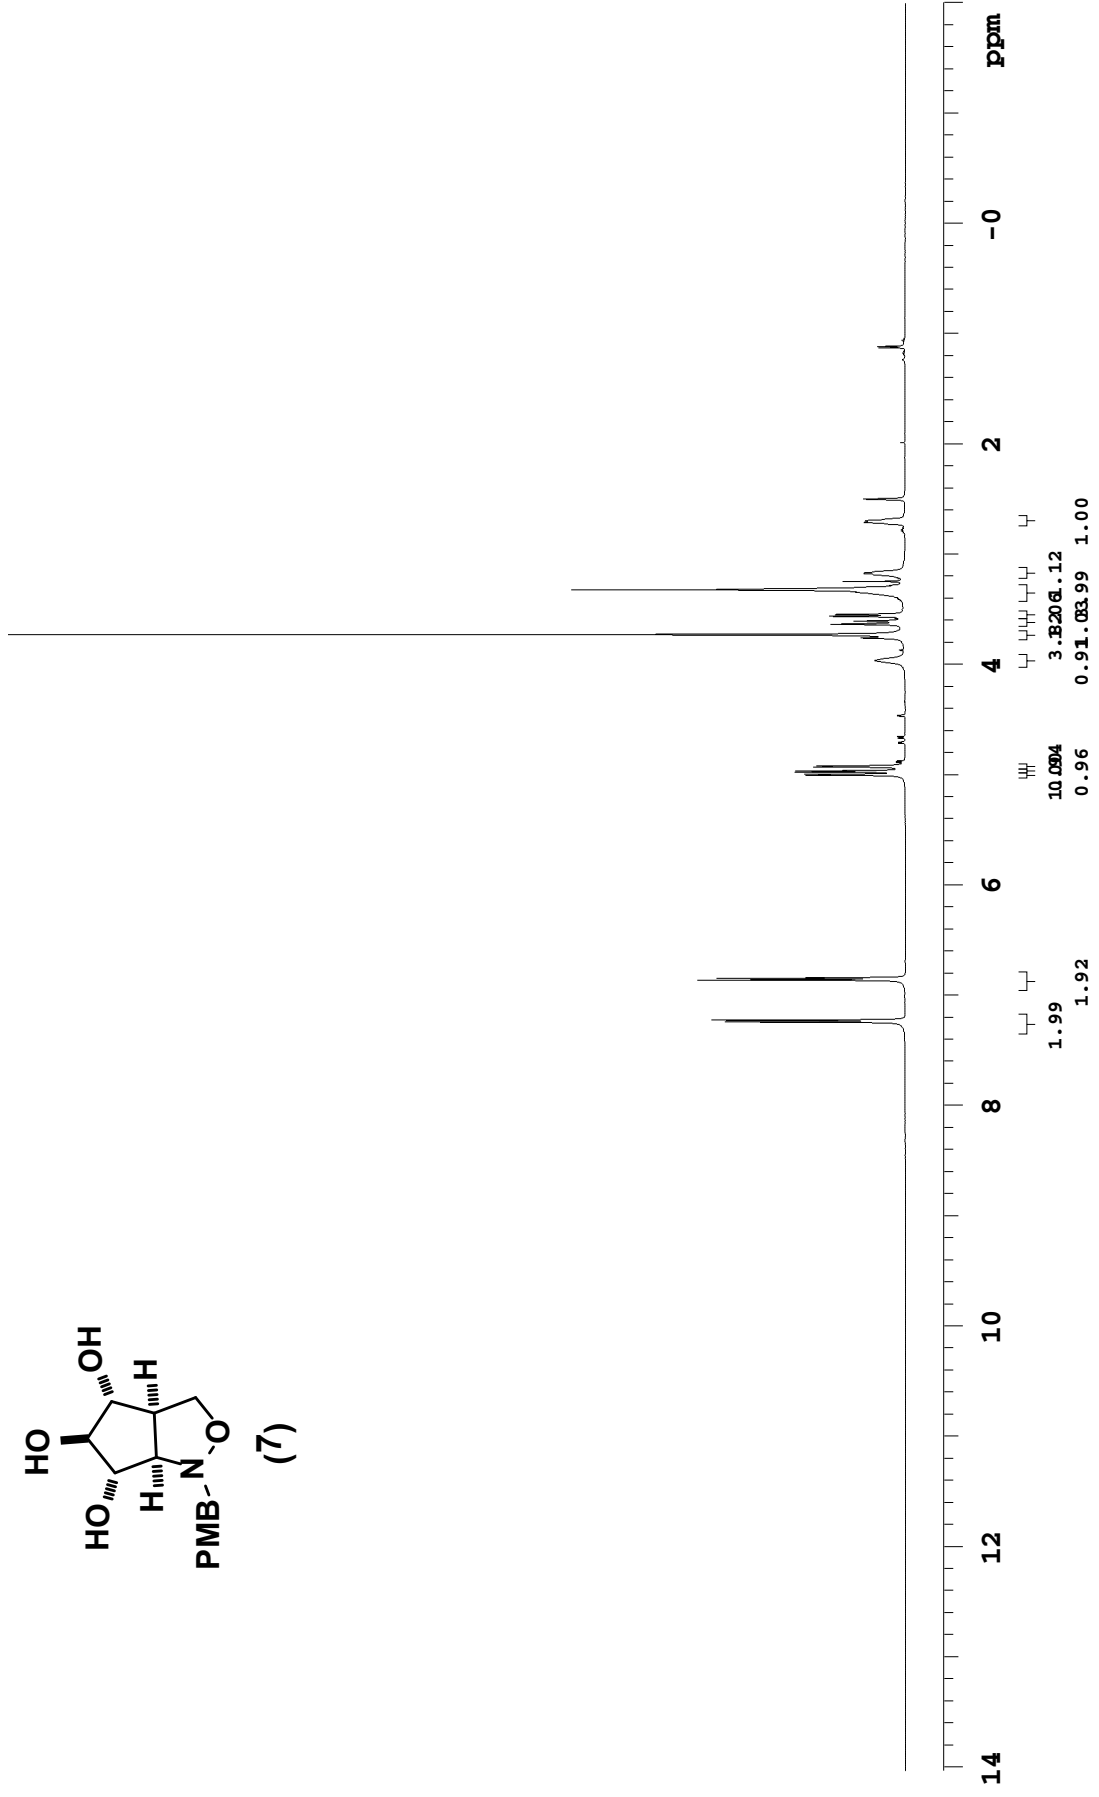

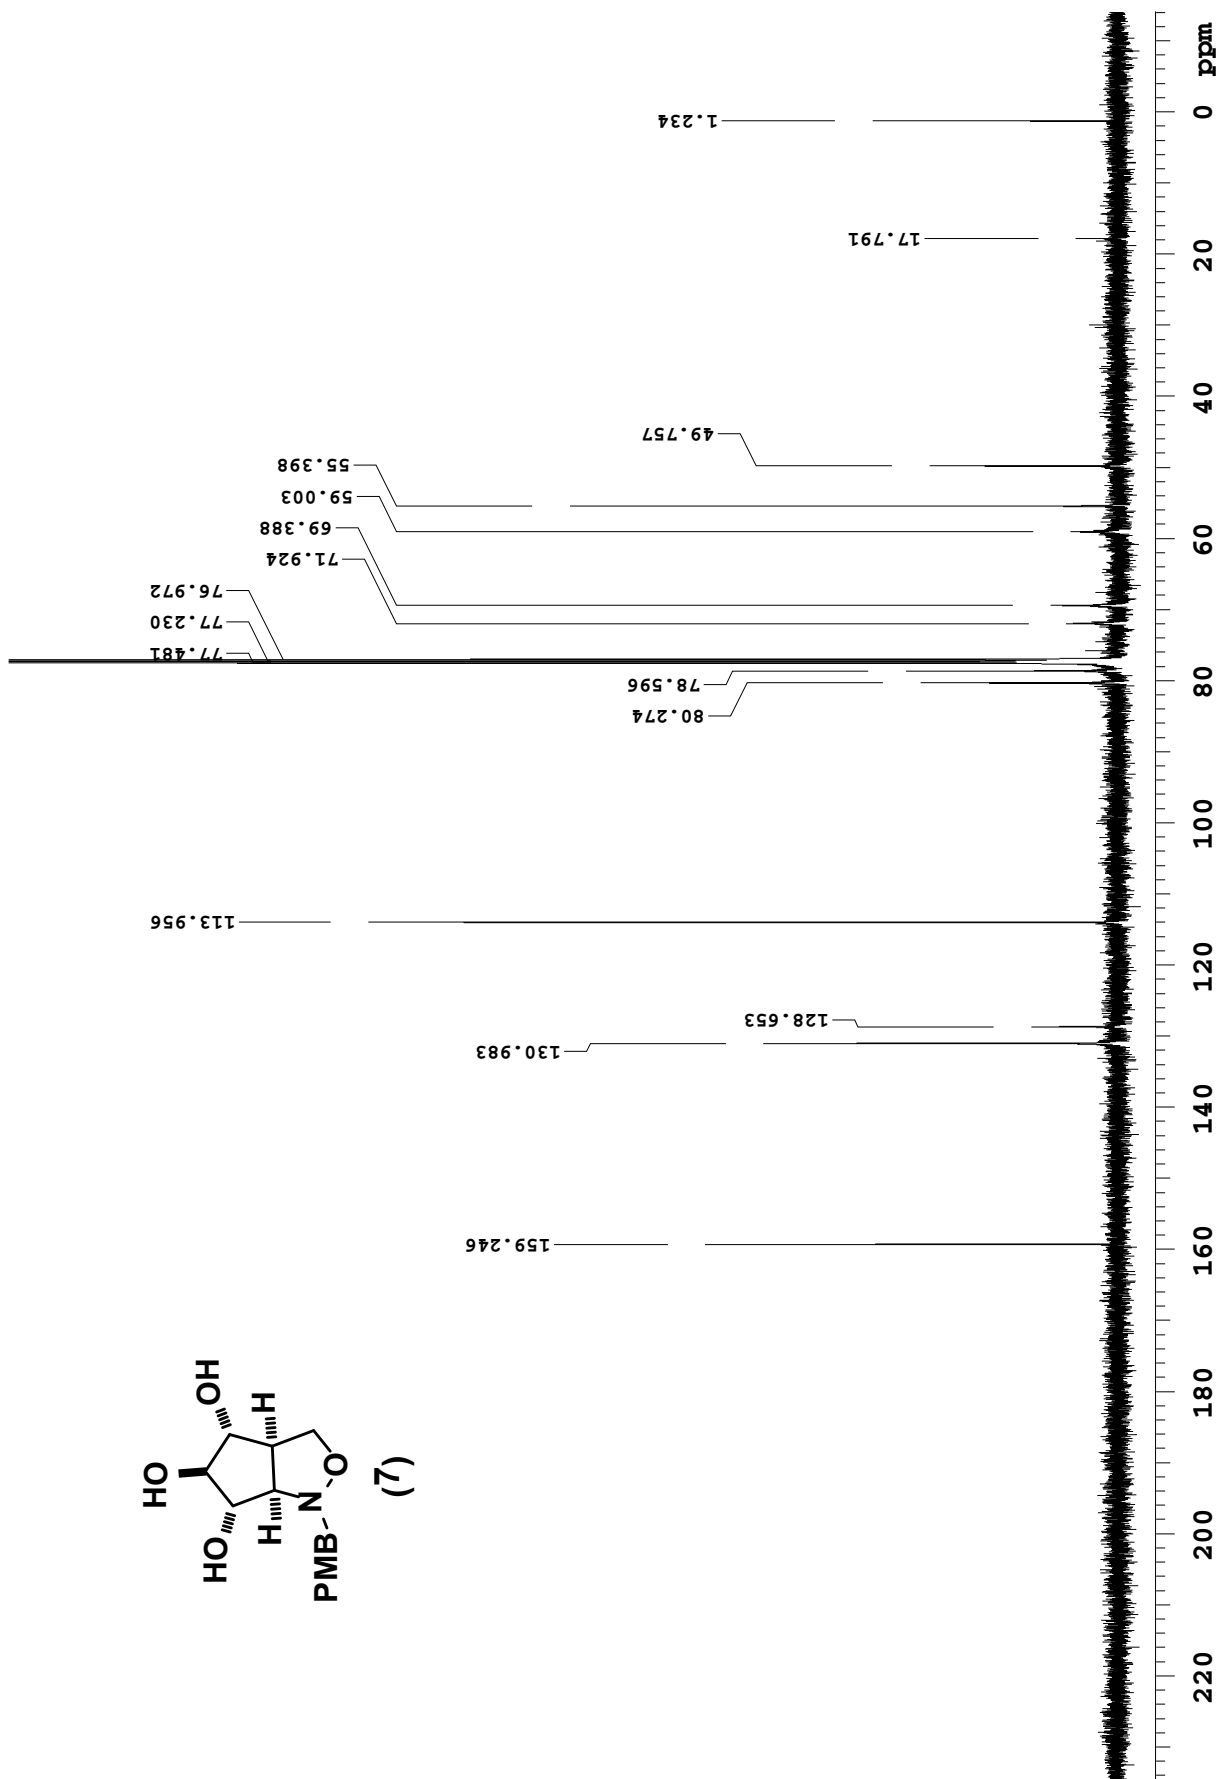

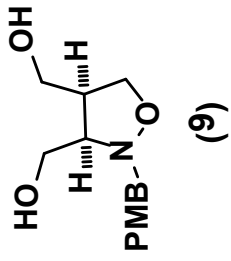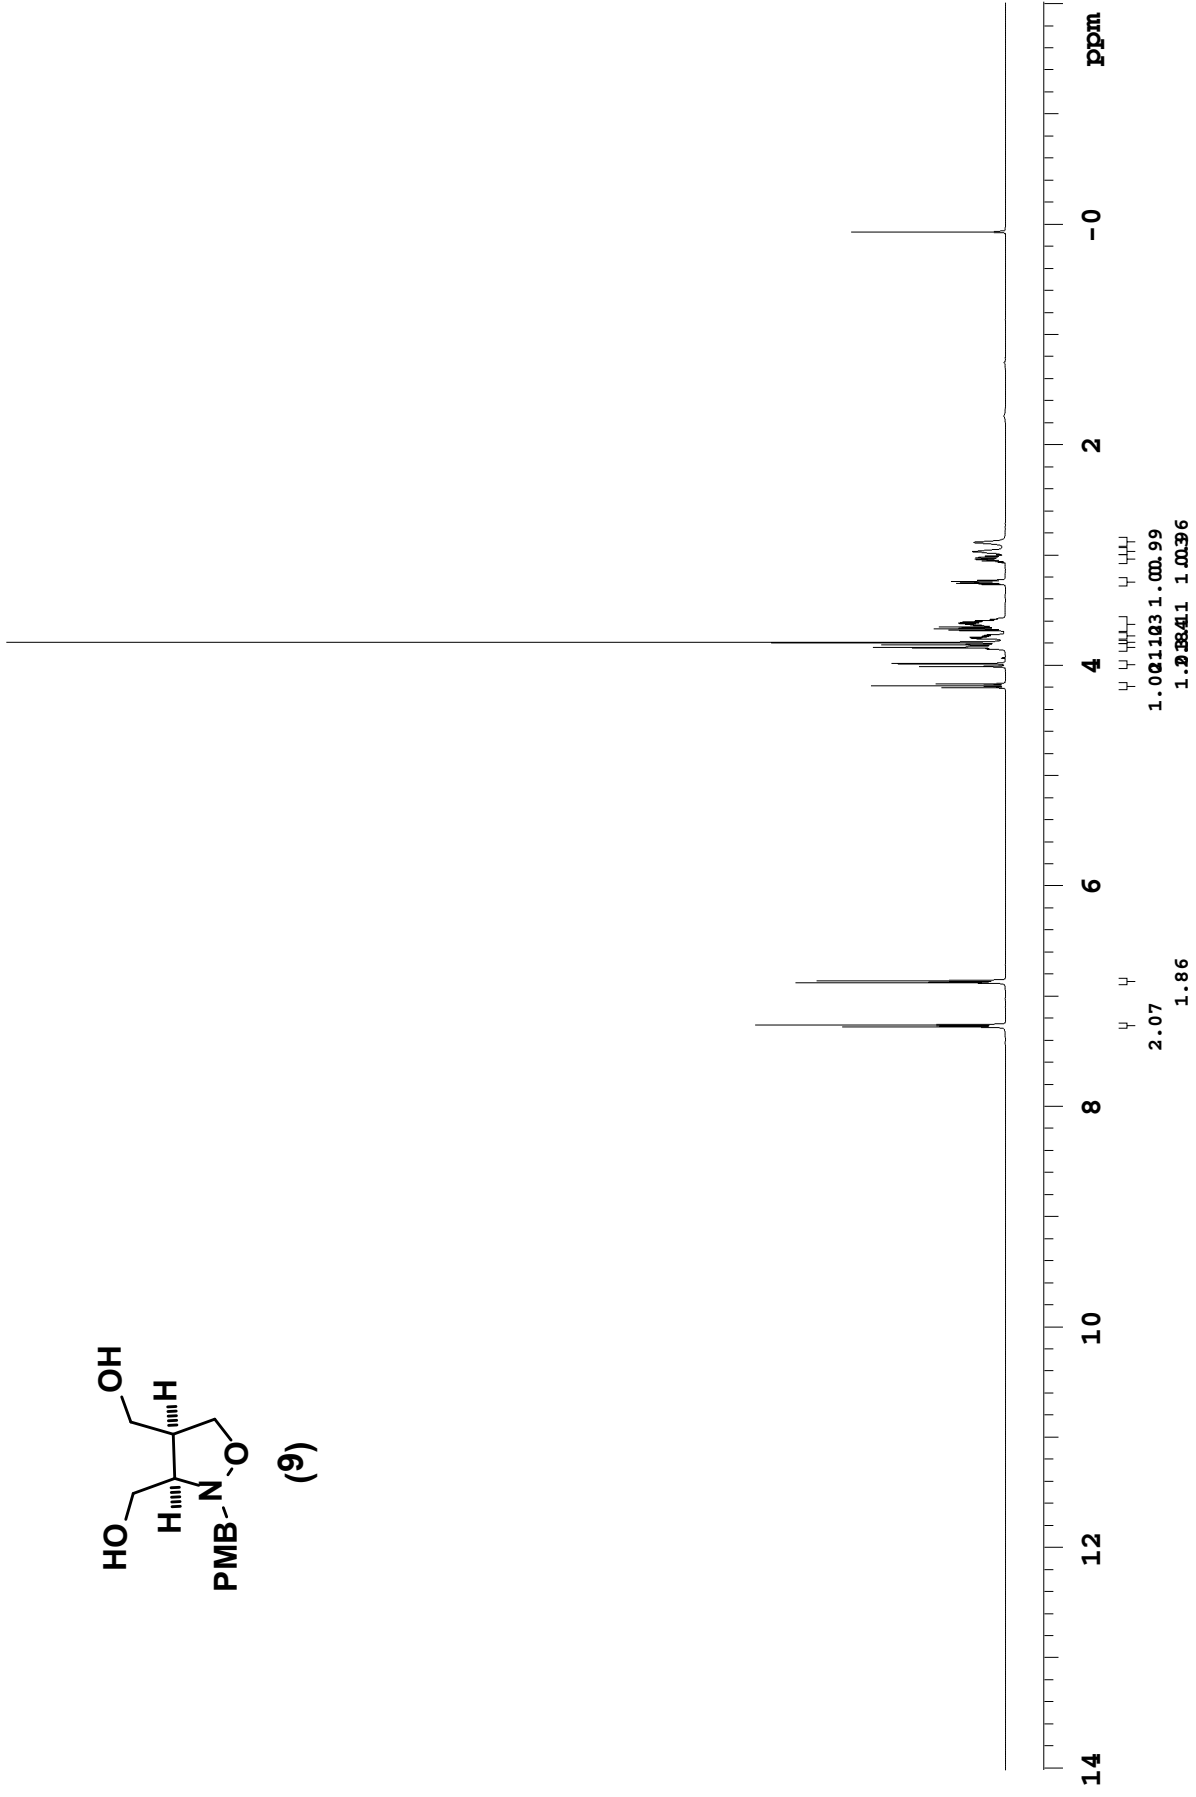

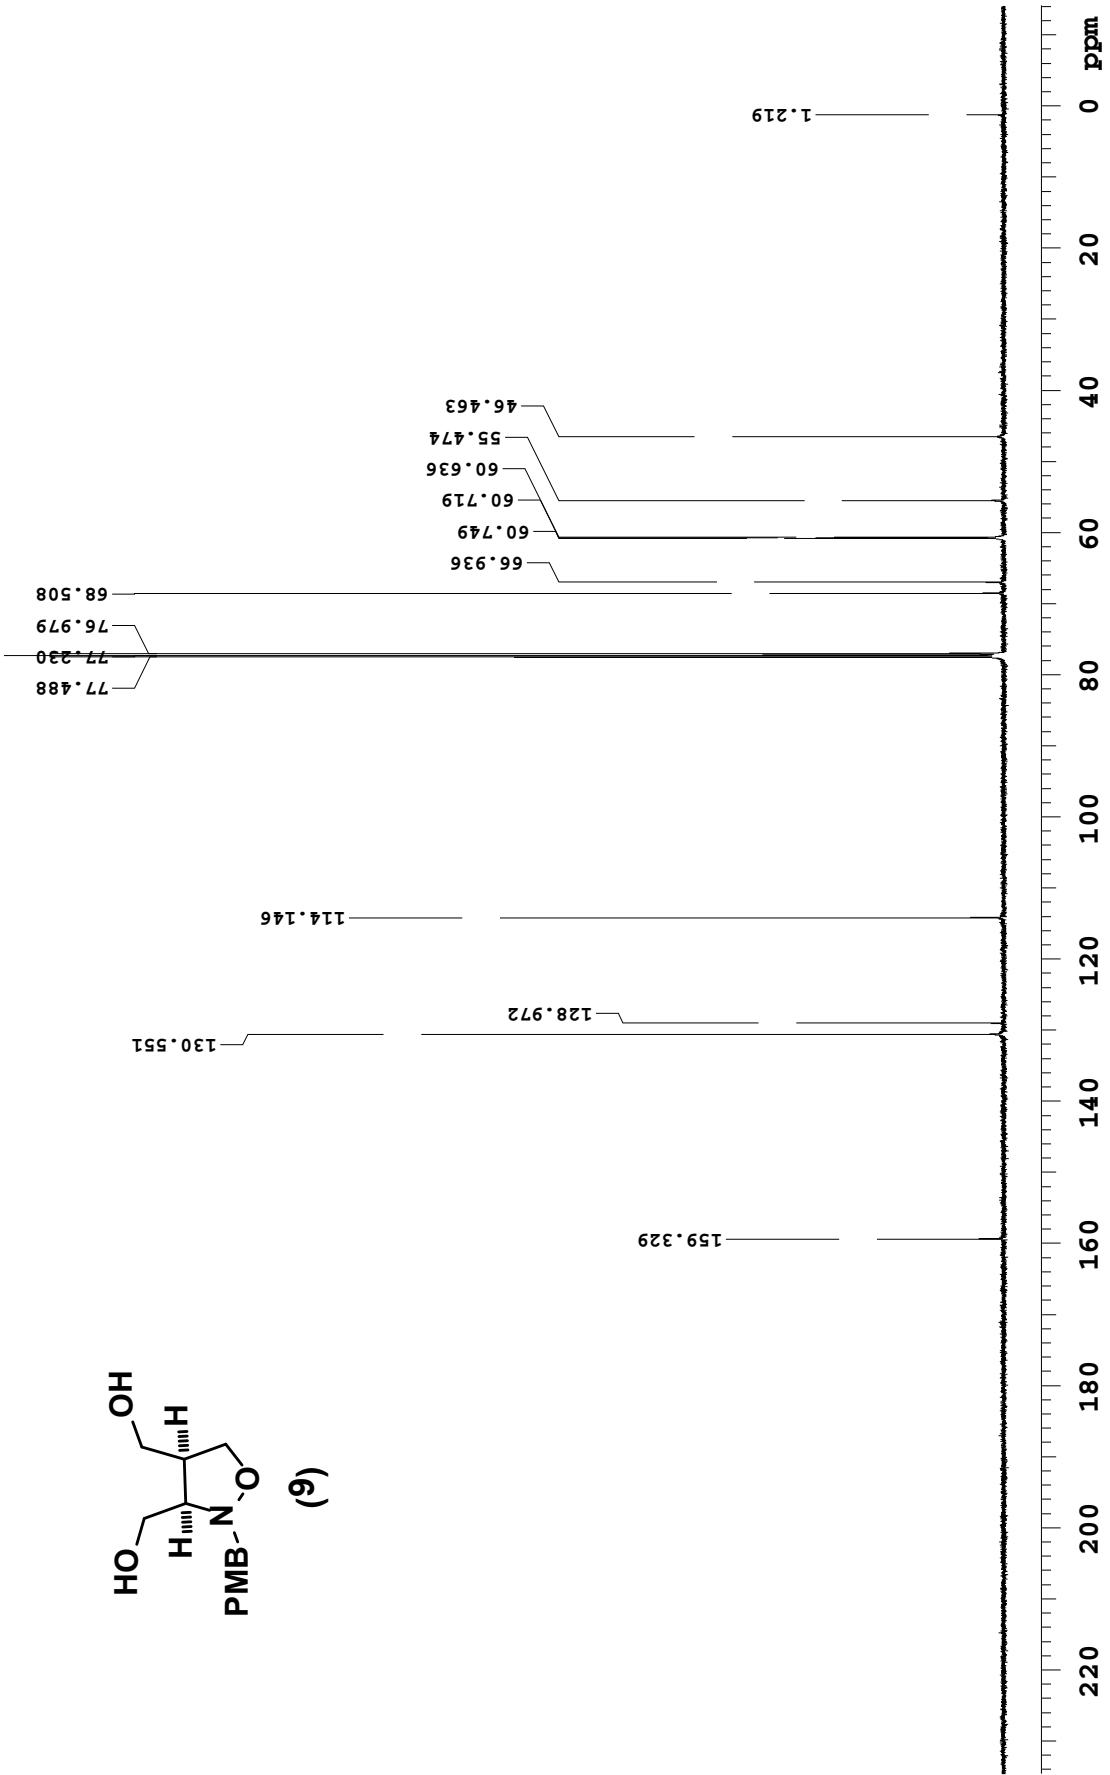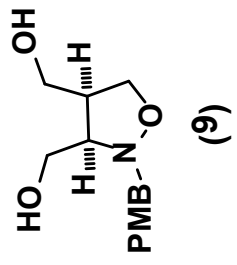



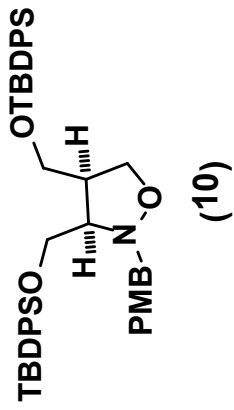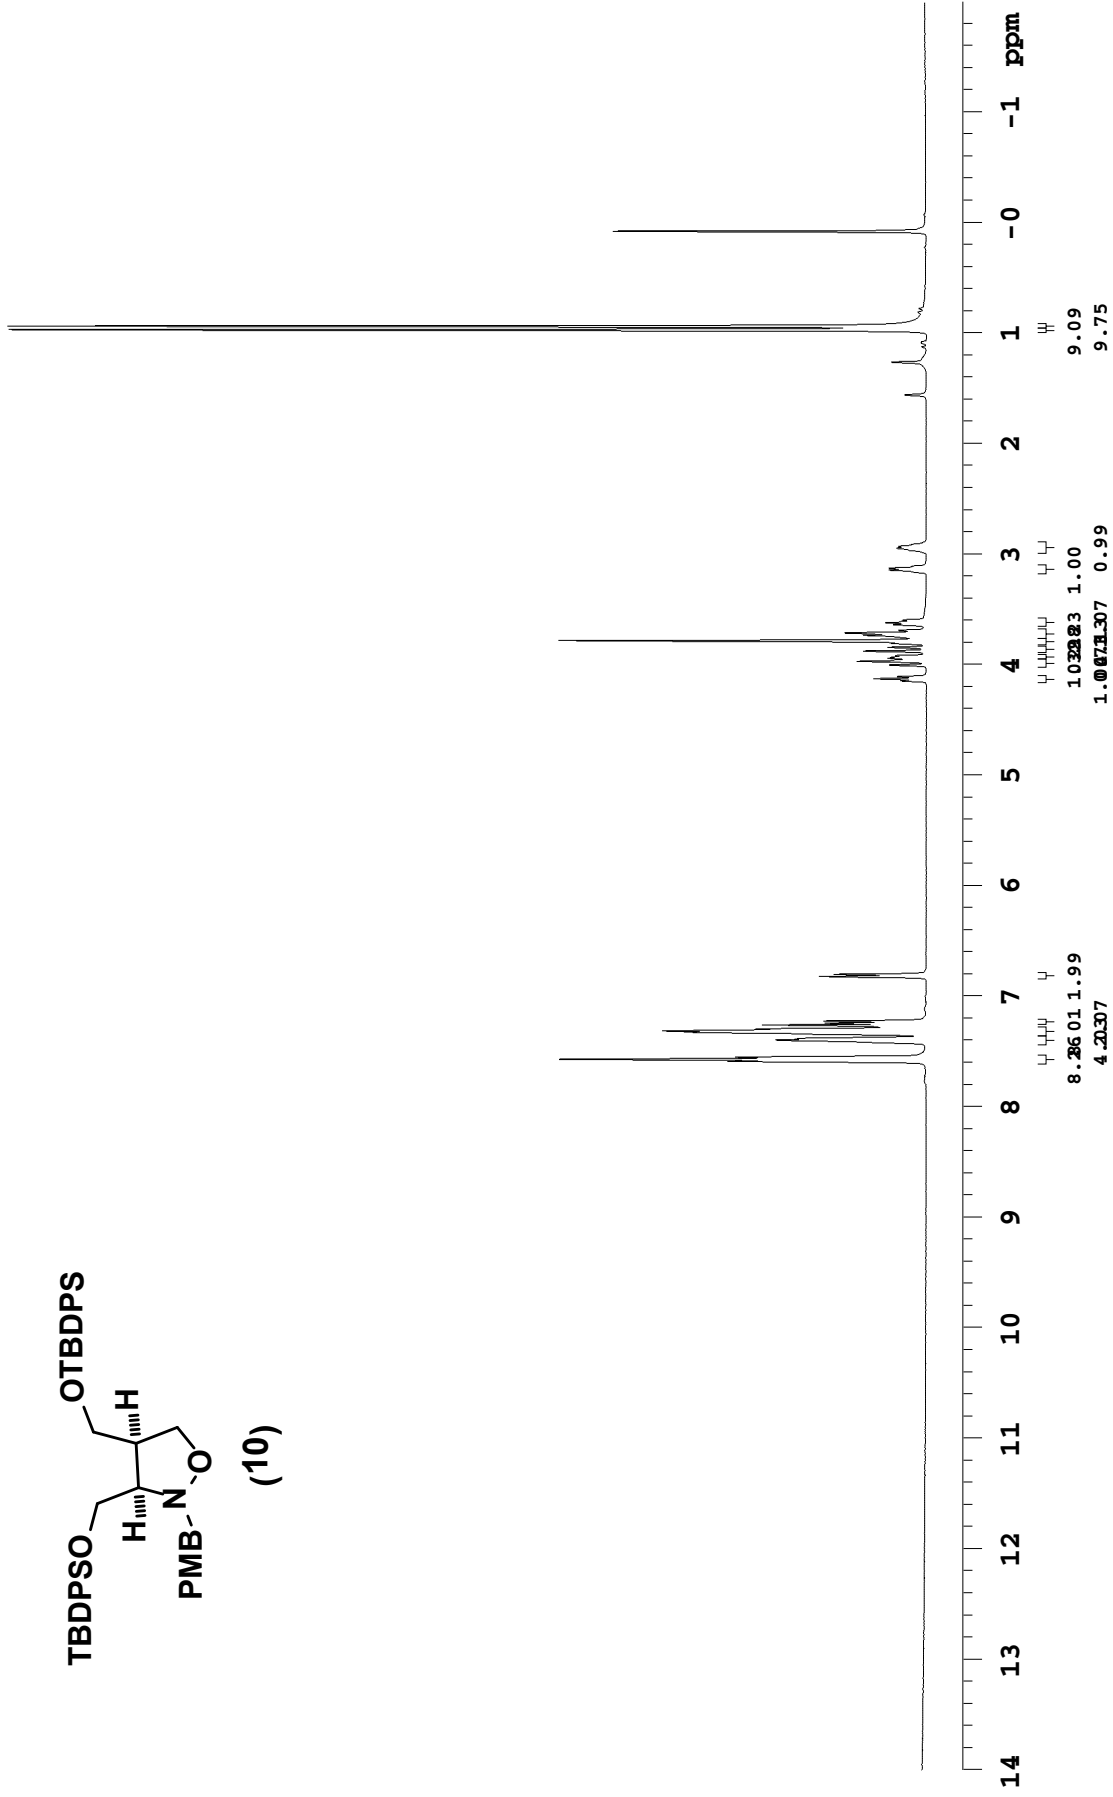

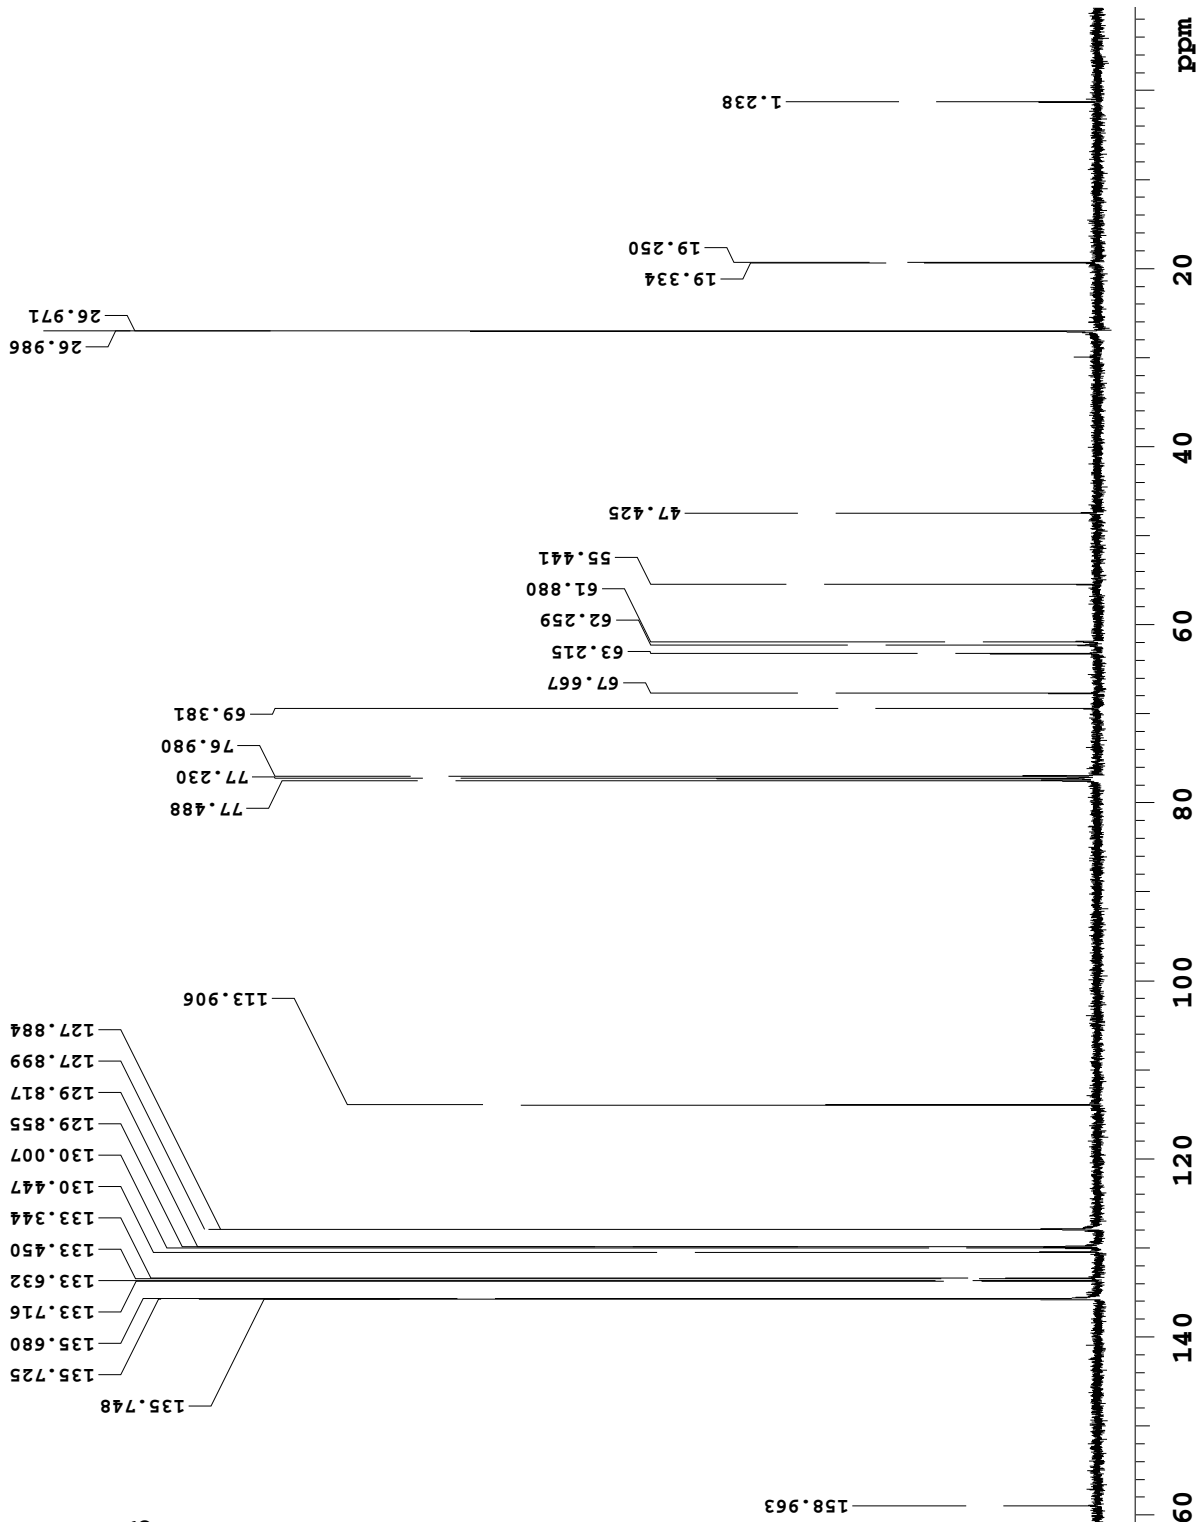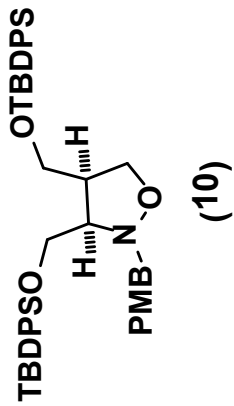

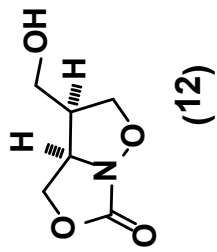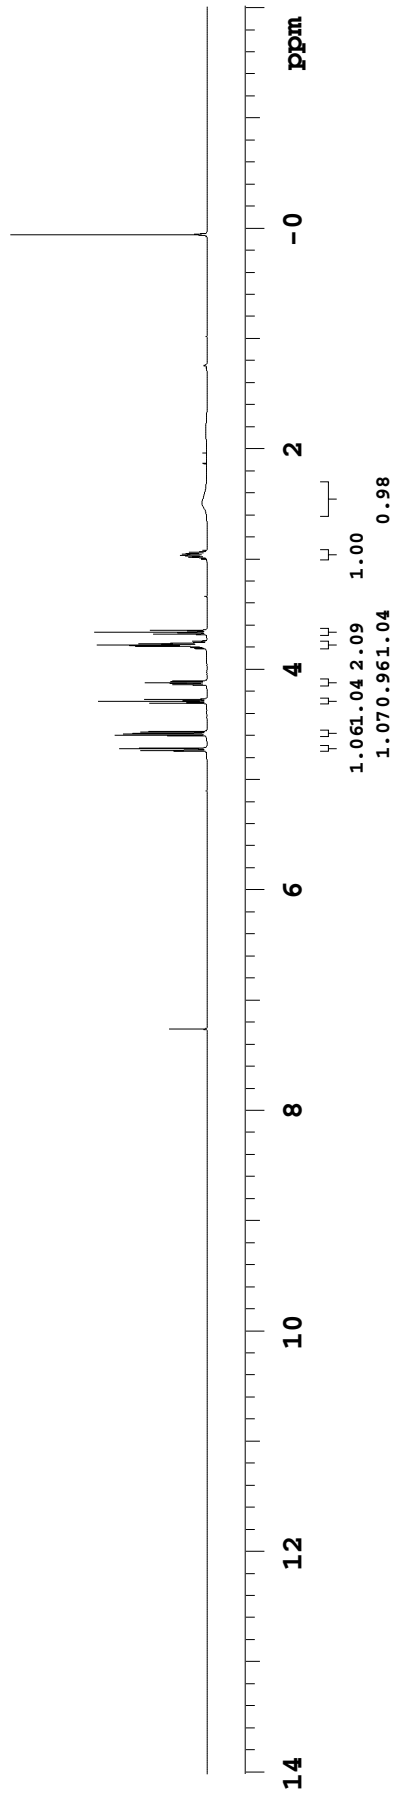

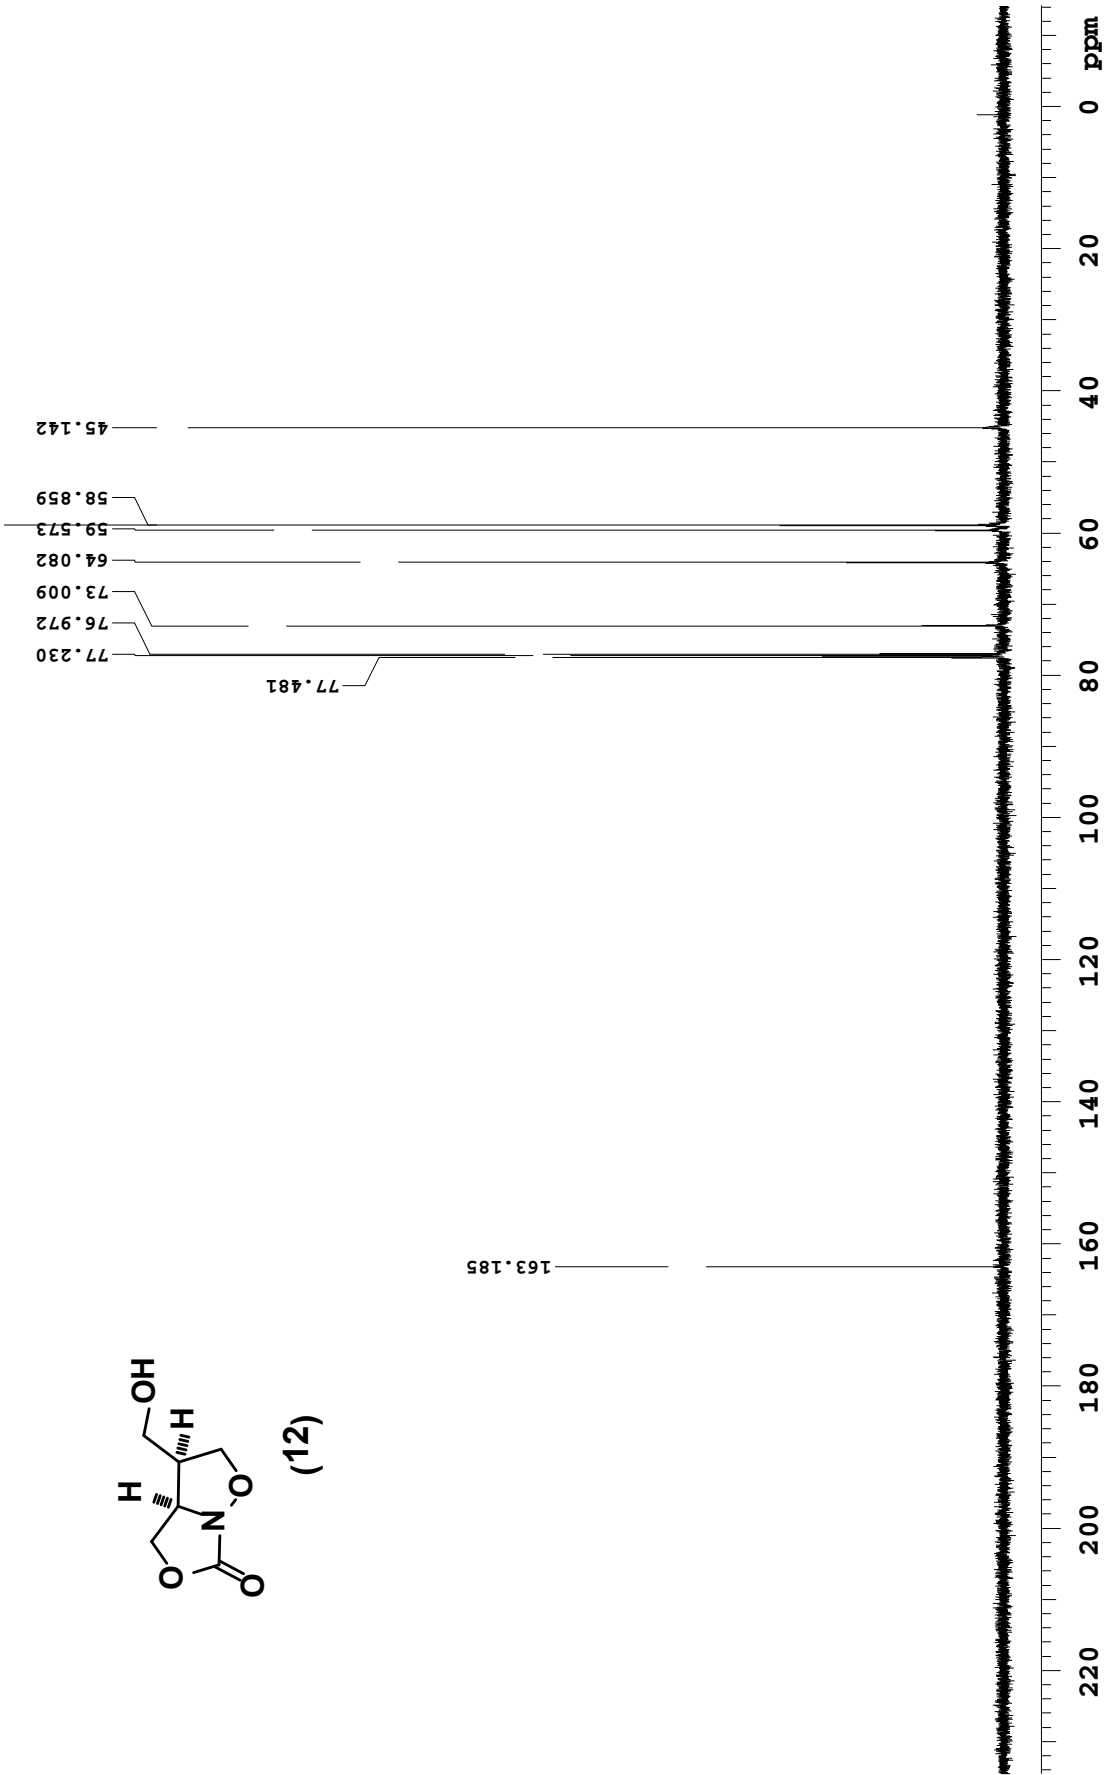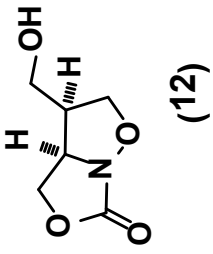





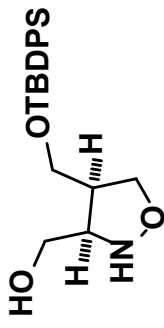

(14)

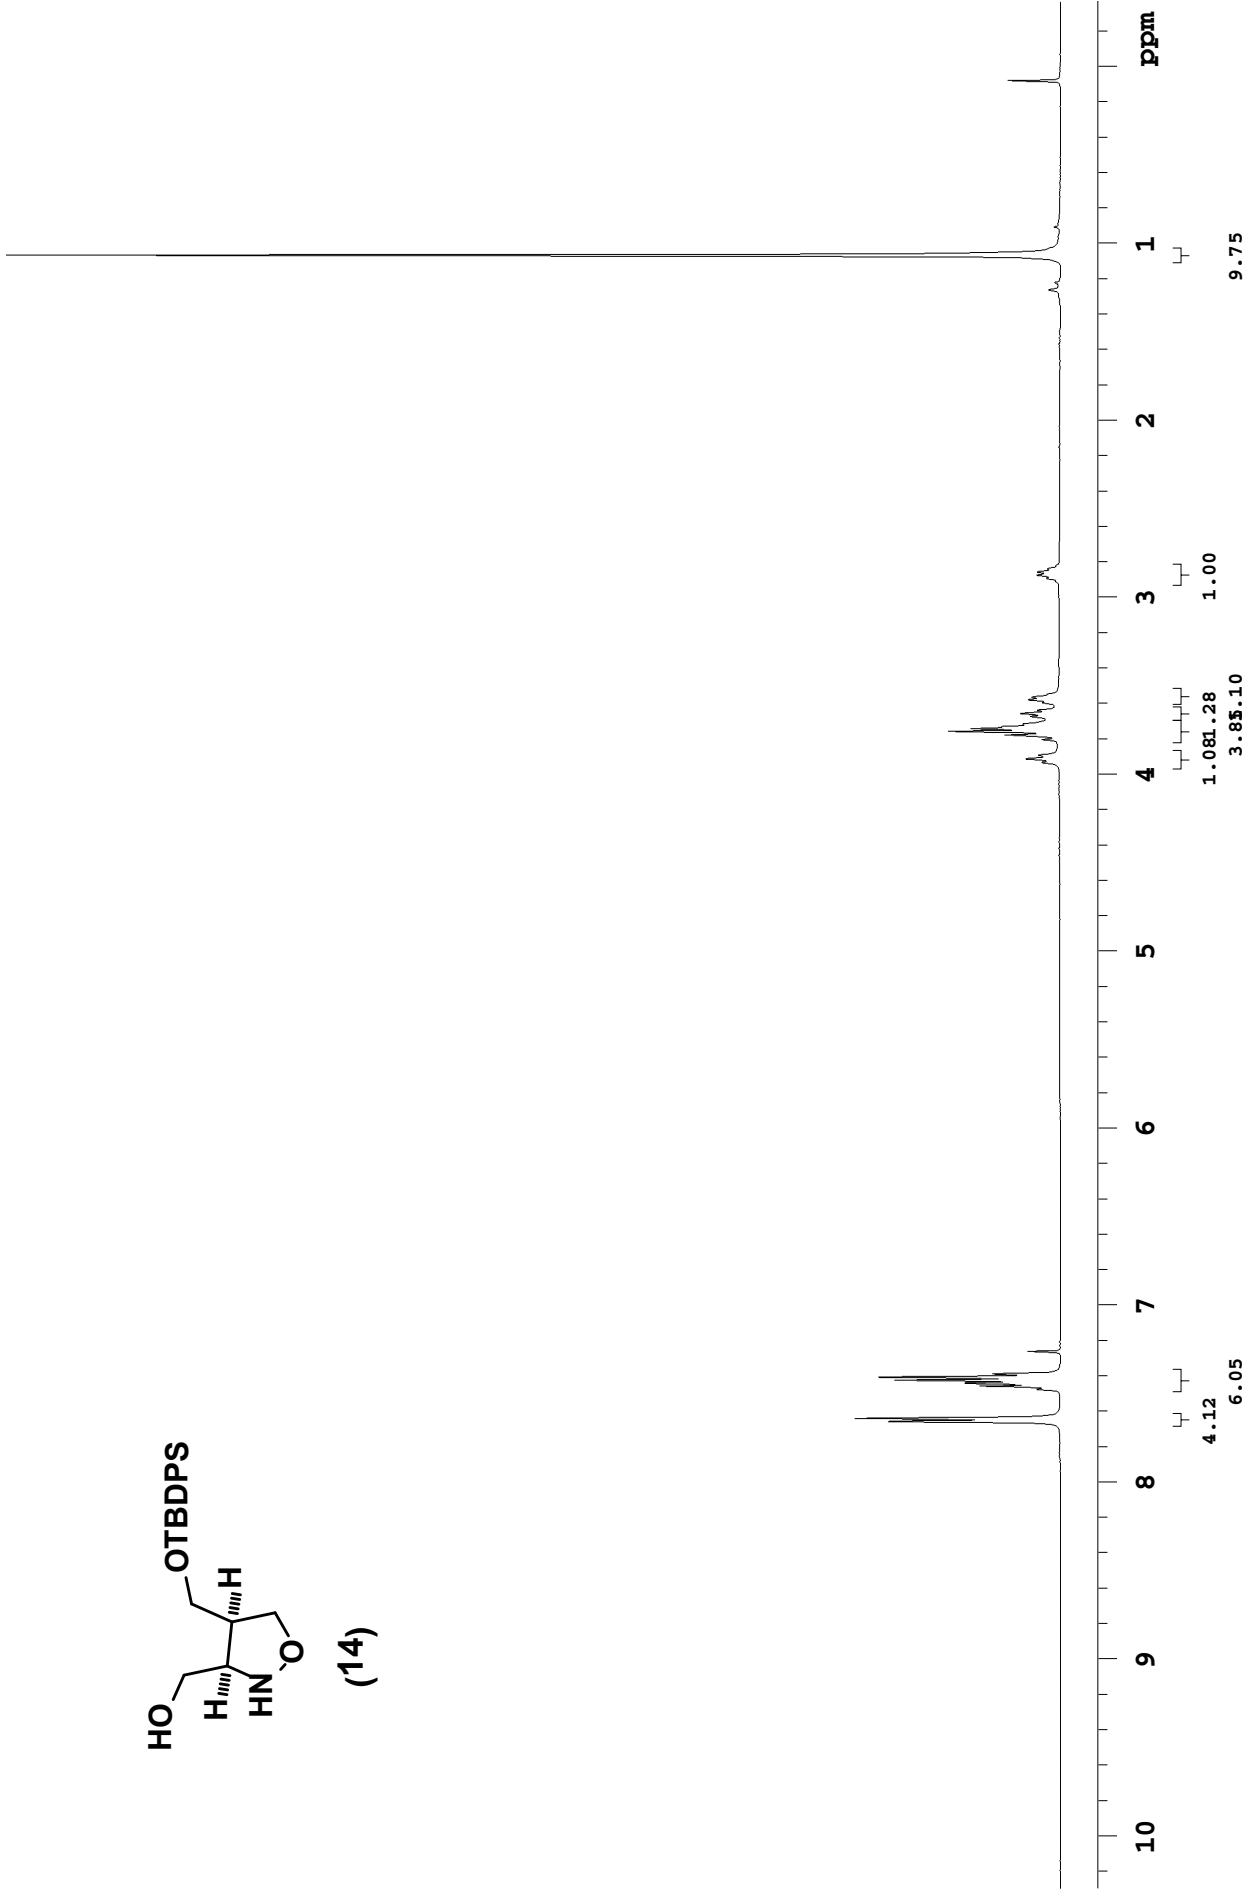

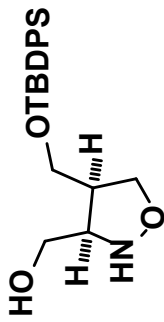

(14)

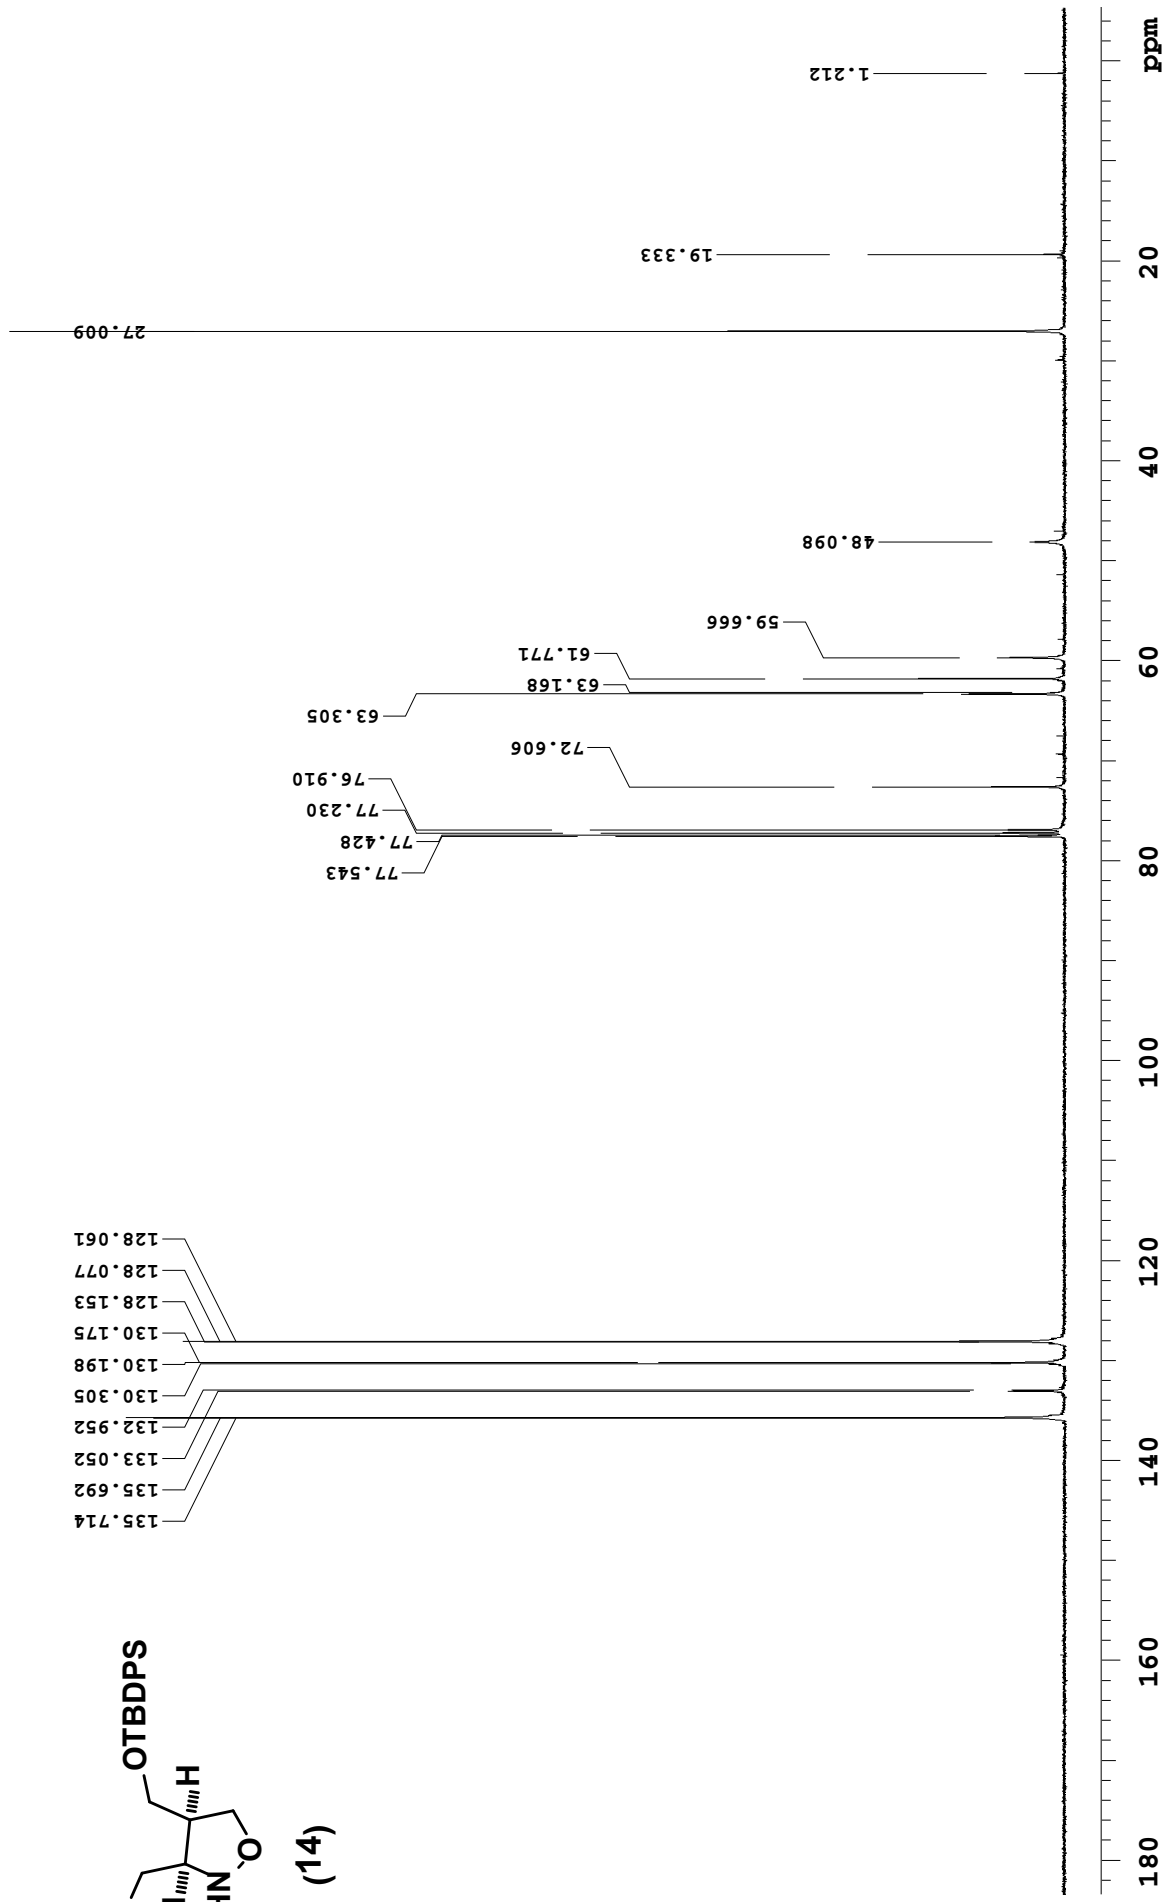



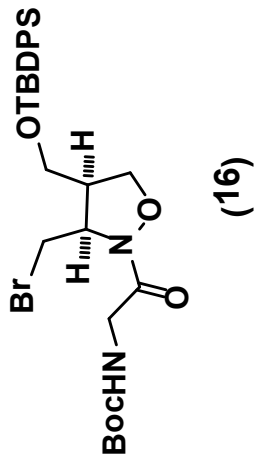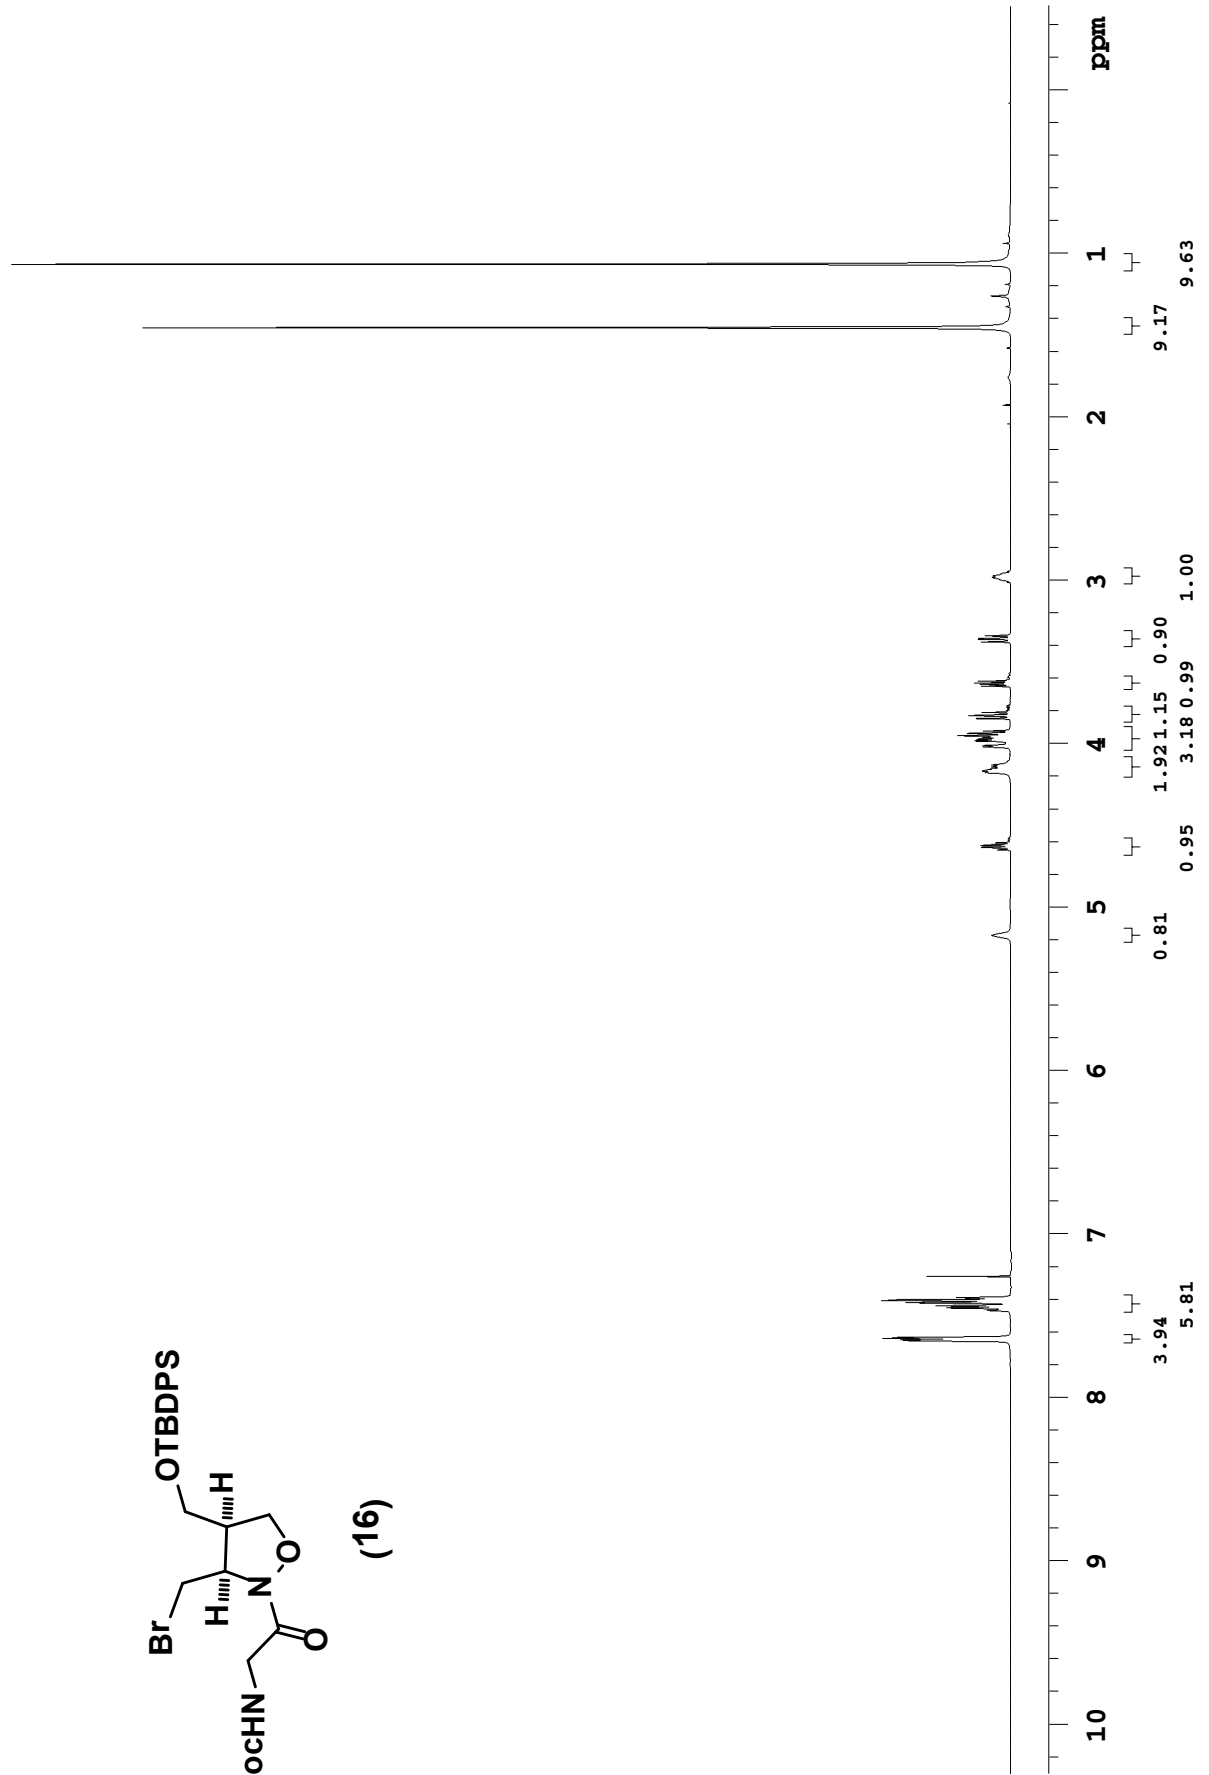

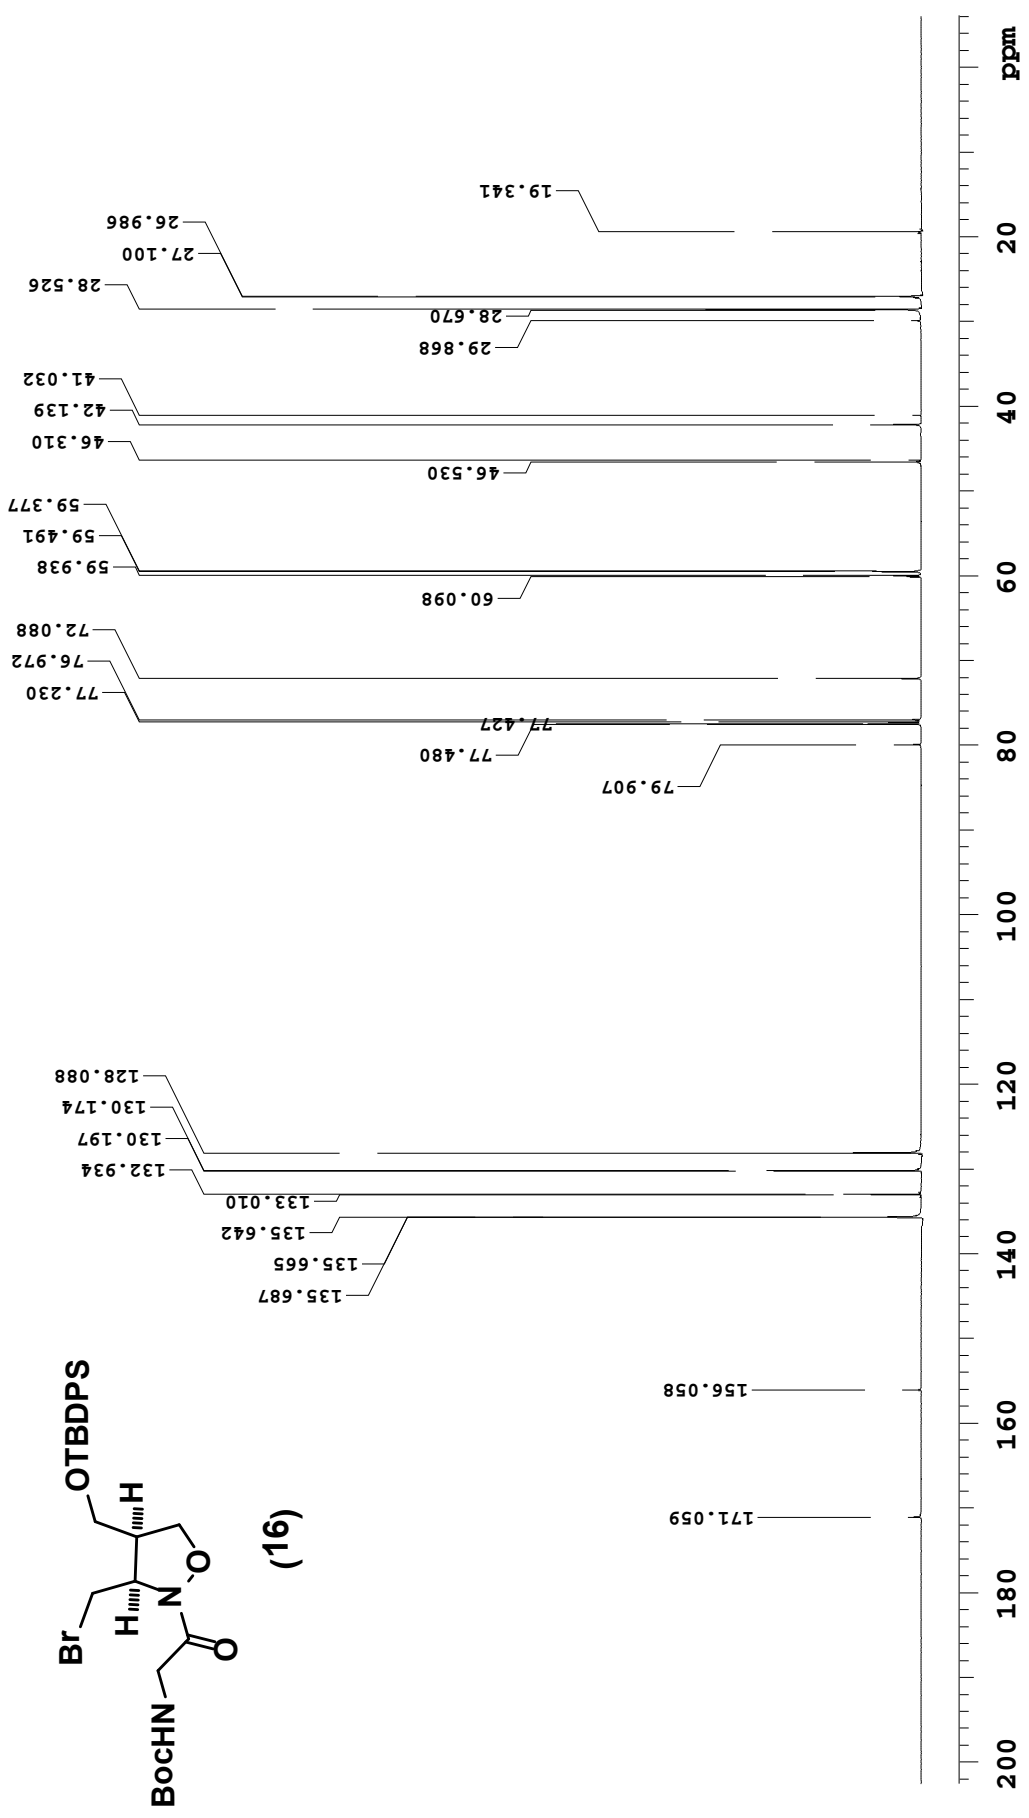

Supplement: NIHMS729582-supplement.pdf [file NIHMS729582-supplement.pdf]
